# Supplementary material for: Comparison of dual-target and mono-target strips for the detection of fentanyl and xylazine
Source: Research Square preprint supplement (doi:10.21203/rs.3.rs-7776000/v1), 2025-10-17
Supplement: Supplementary file 1 [file 45762e7f85e7adc1f2e46b84.docx]

# Supporting information

**Comparison of dual-target and monotarget strips for the detection of fentanyl and xylazine**

Hirudini Fernando, Anita Amate, Marya Lieberman

## **Table of contents**

Figure S1. Screenshots showing commercial dual test strip products

Figure S2. Photos of test strips used in this study

Figure S3. Scorecard used for the classification of test strip results with ImageJ line intensities

Table S1. Xylazine line of DSG V1 strip LOD pictures and line intensities

Table S2. Fentanyl and fentanyl analogs tested with DSG Version 1

Table S3. Xylazine line intensities for DSG Version 1, BTNX, and WHPM xylazine strips

Table S4. Fentanyl test strip results for selected fentanyl analogs at 100 ng/mL

Table S5. Cis-tramadol shows false positive for the fentanyl line on DSG v1 test strips

Table S6. Lidocaine shows false positive for xylazine line on DSG v1 test strips

Table S7. False positive for PCP

Table S8. False positive for diphenhydramine

Table S9. Nitazene and nitazene analogs tested on DSG, WHPM, BTNX test strips

Figure S4. Xylazine test strip [ DSG v1] performance at 1000 and 2000 ng/mL

Figure S5. False positive test results for DSG V2

Table S10. Composition of artificial urine

## Figure S1. Screenshots showing commercial dual test strip products


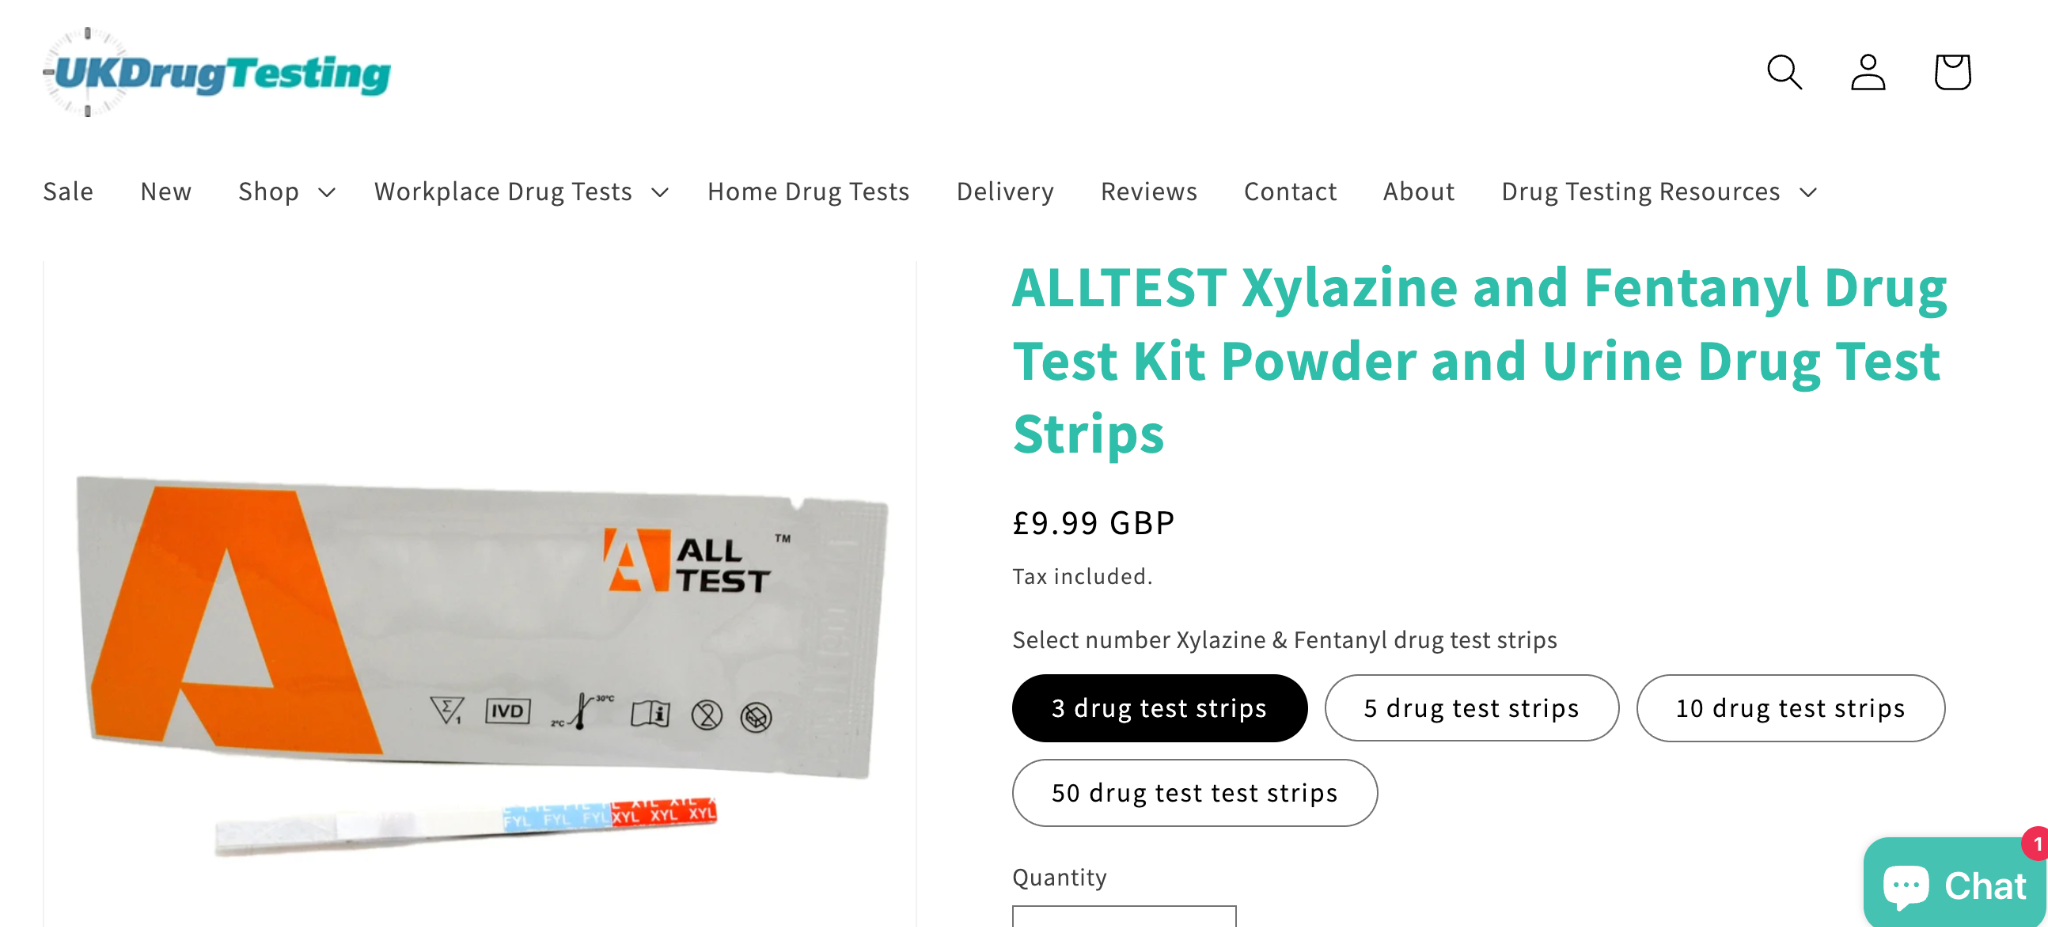


Accessed on 6 August 2025: Alltest Xylazine and Fentanyl test strips

Accessed on 6 August 2025: TN scientific Fentanyl and Xylazine test strips
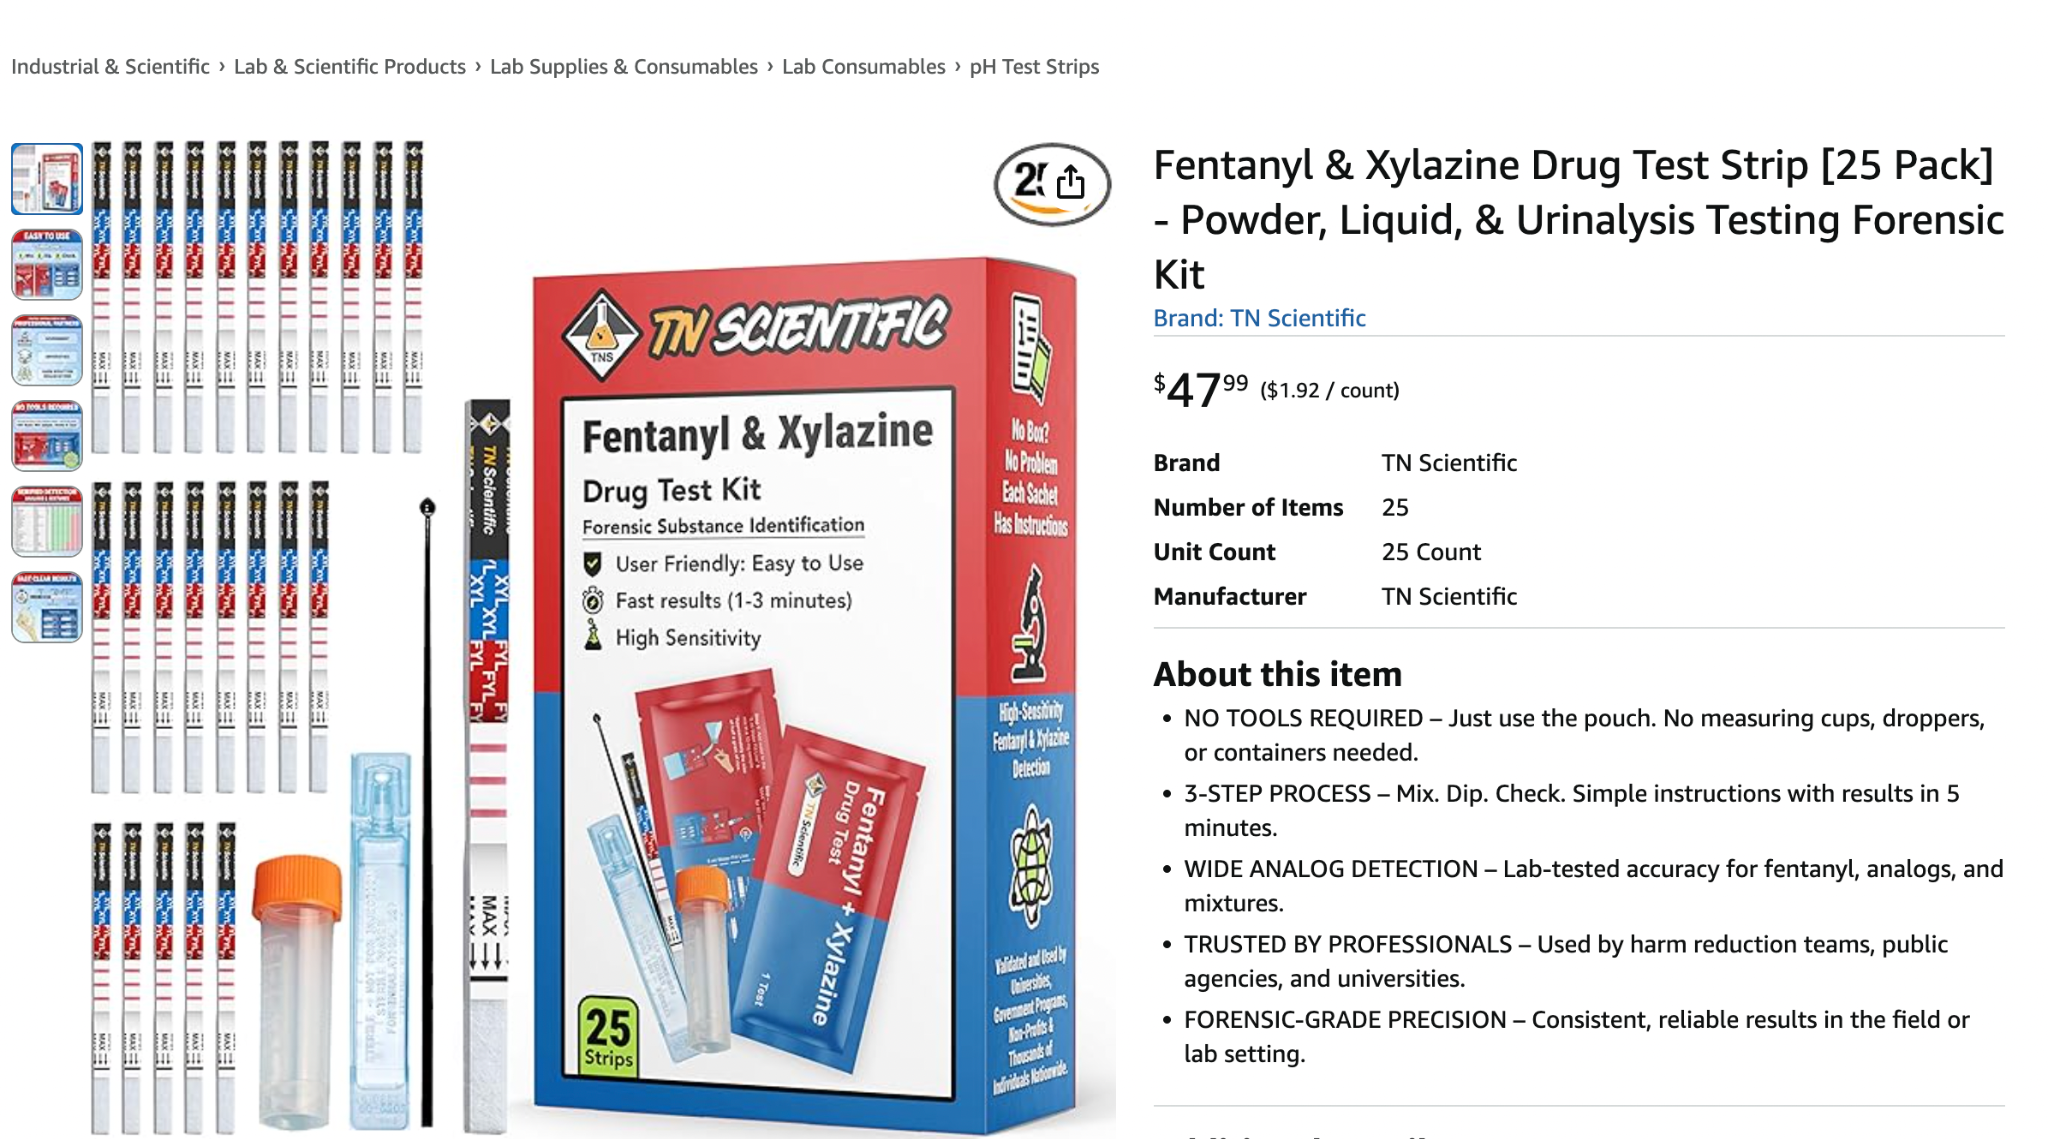


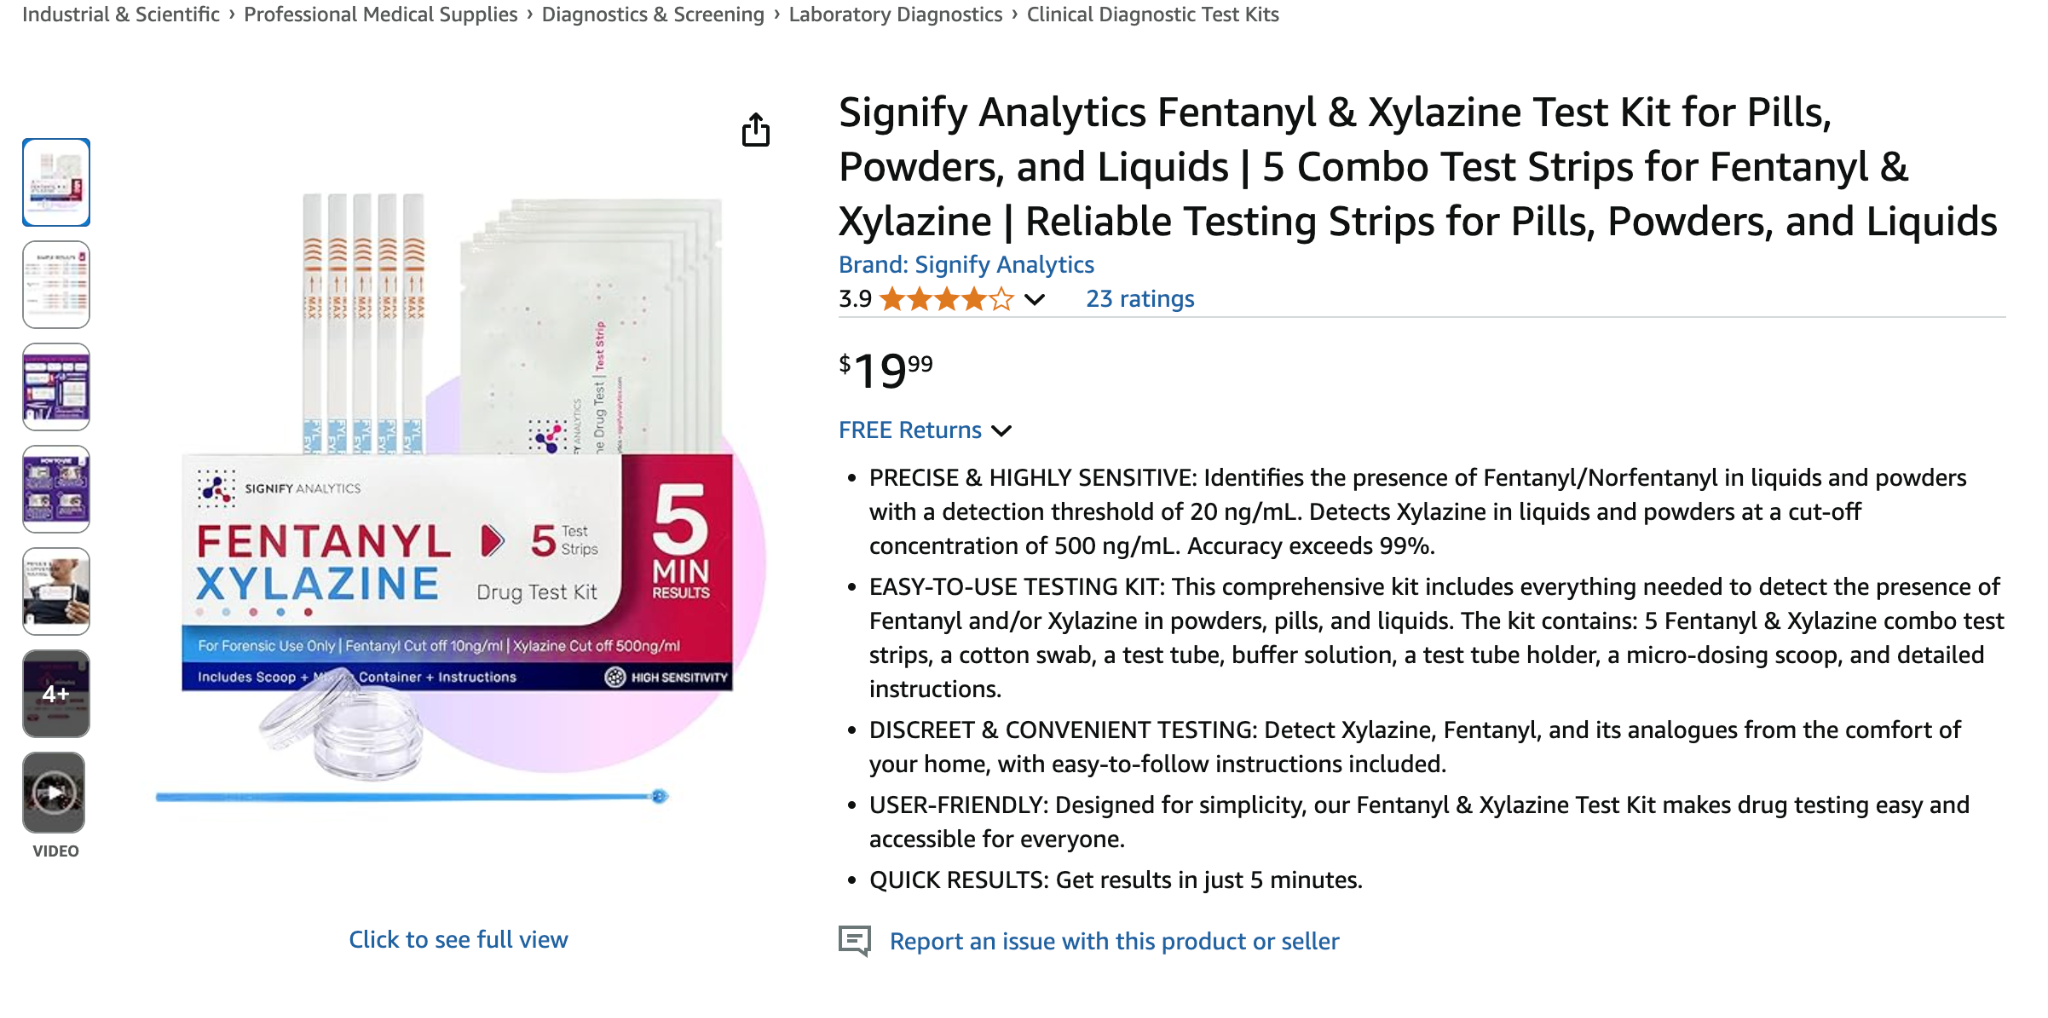


Accessed on 6 August 2025: Signify Analytics Fentanyl and Xylazine test strips


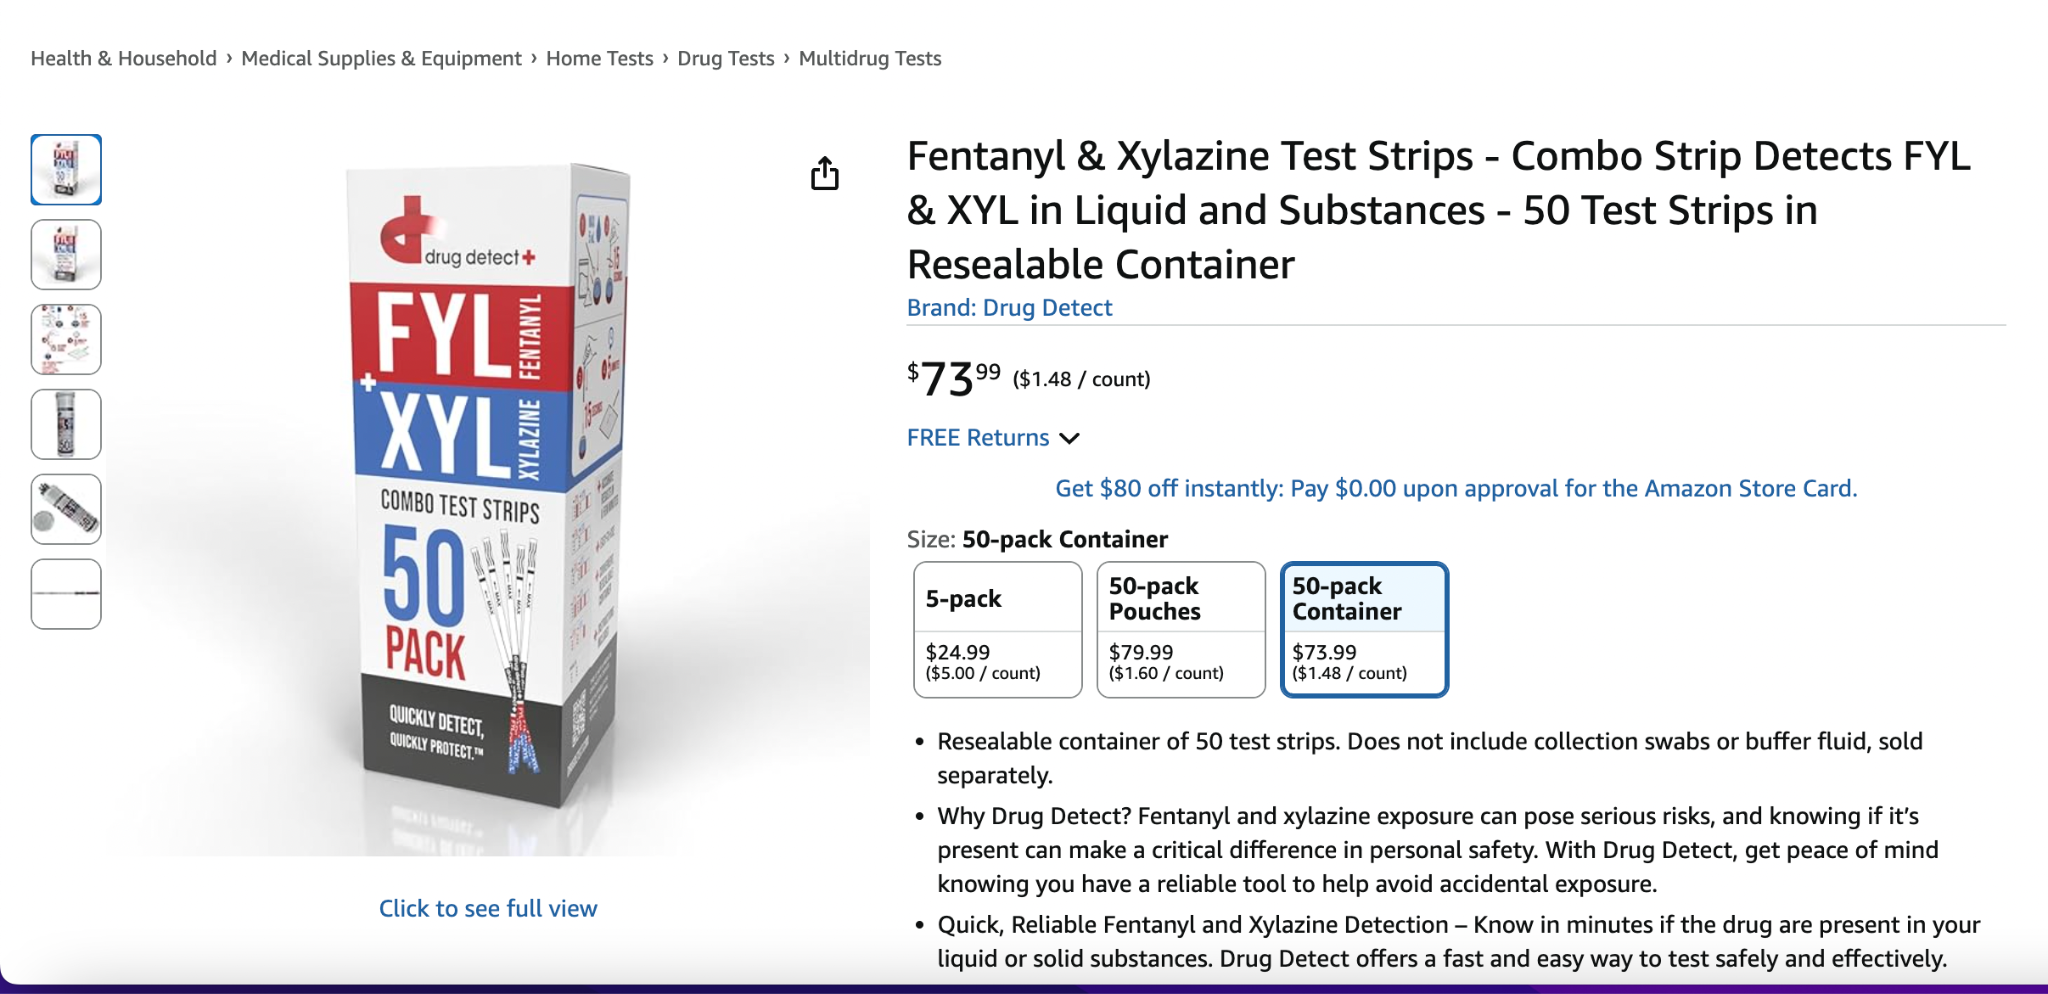


Accessed on 11 August 2025: Drug Detect Fentanyl and Xylazine test strips

## Figure S2. Photos of test strips used in this study

1] HarmGuard FX multi-analyte rapid test strip [DSG version 1], 2] Rapid Response fentanyl test strip [BTNX], 3]DanceSafe fentanyl test strip [WHPM], 4]xylazine test strip [WHPM], 5] Rapid Response xylazine test strip [BTNX], 6] HarmGuard FX multi-analyte rapid test strip [DSG version 2]


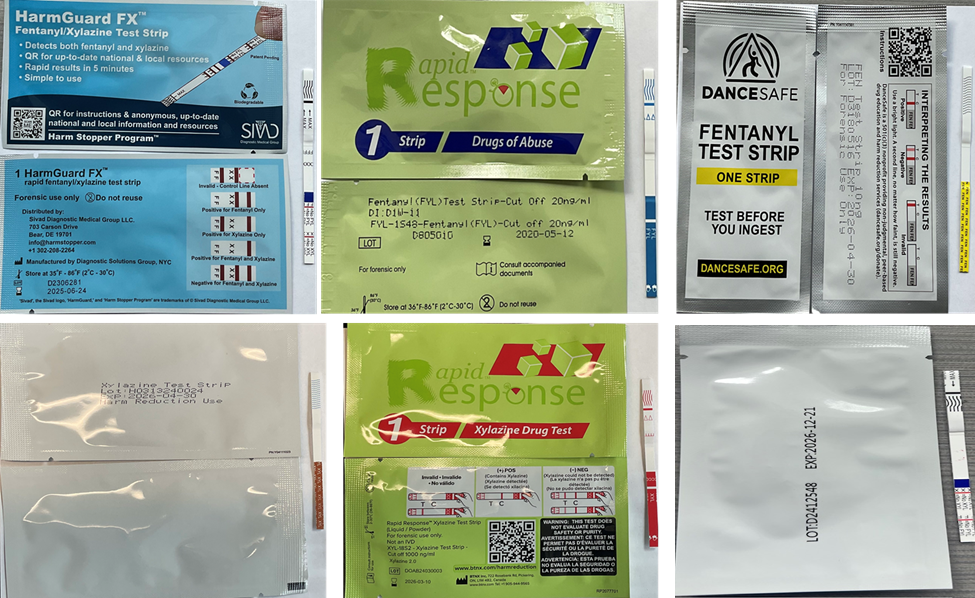


## Figure S3. Scorecard used for the classification of Test Strip results with ImageJ line intensities


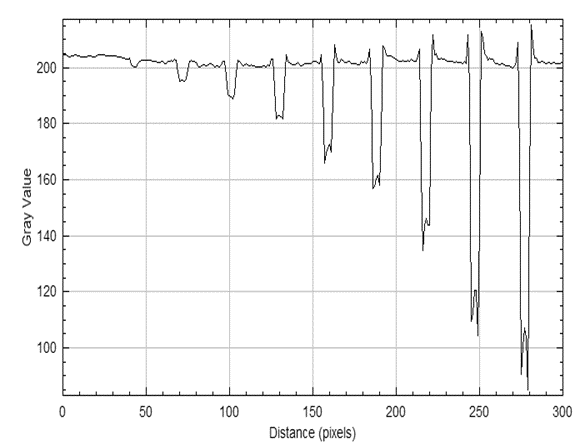


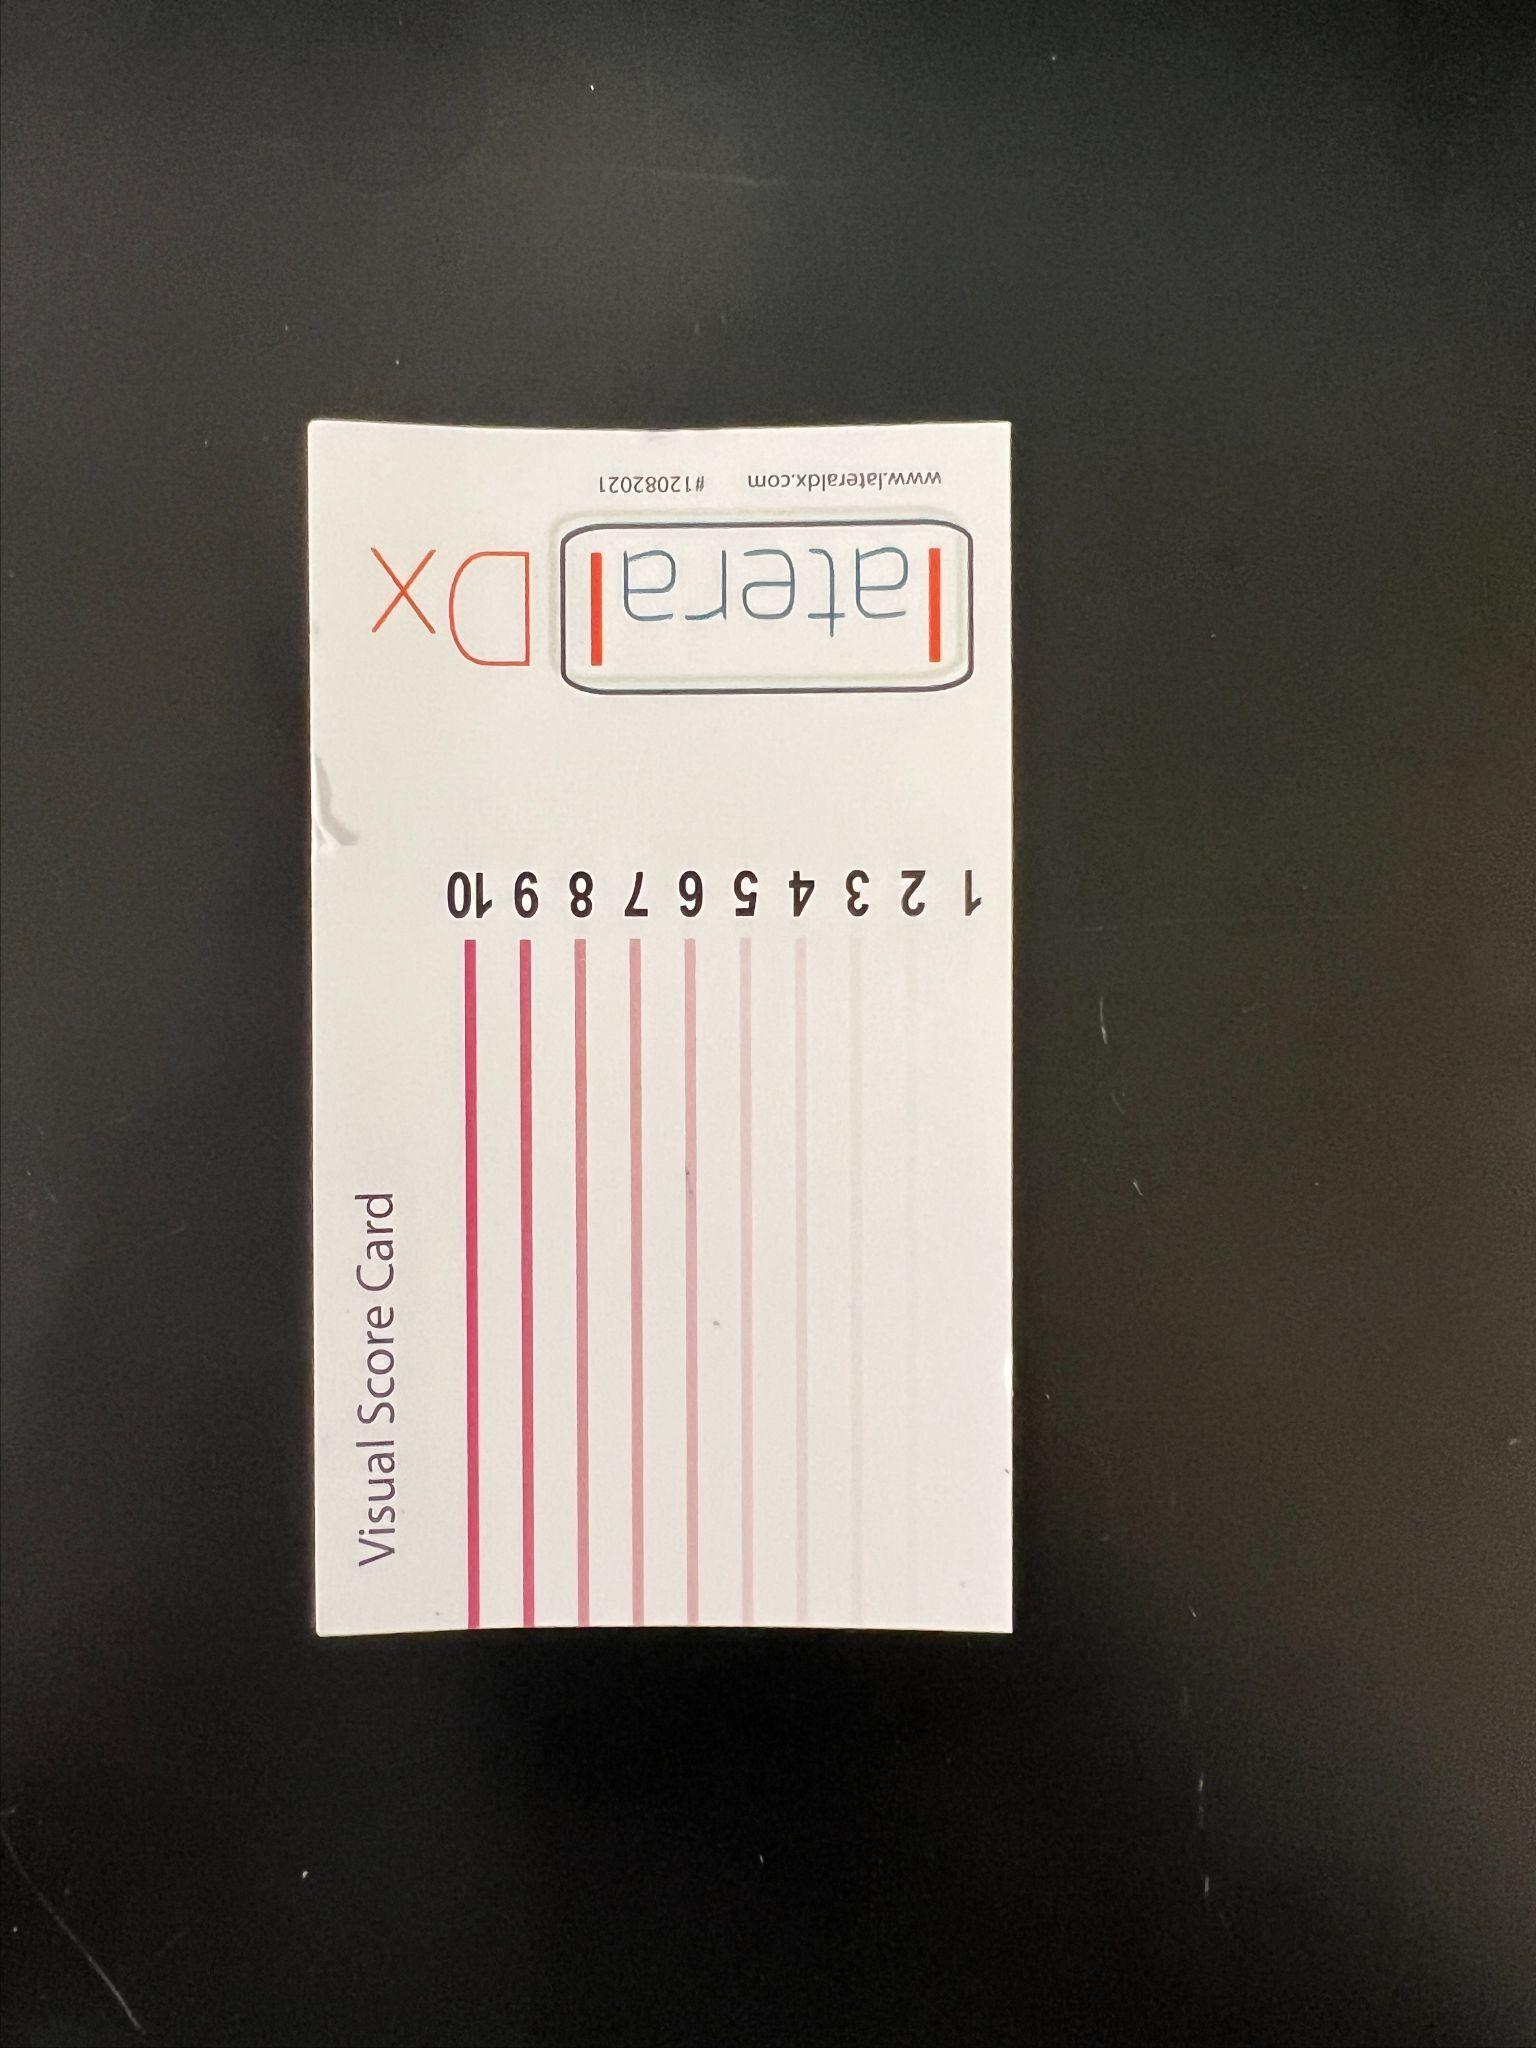


##

## Table S1. Xylazine line of DSG V1 strip LOD pictures and line intensities

| Analyte | Conc (ng/ml) | Results | | Intensity  (Fent) | Intensity (xyl) | Pictures of Test Strips |
| --- | --- | --- | --- | --- | --- | --- |
| Fent | Xyl |
| Xylazine  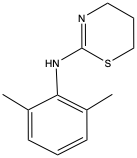 | 2500 | - - - | +++ | 888 | 000 | 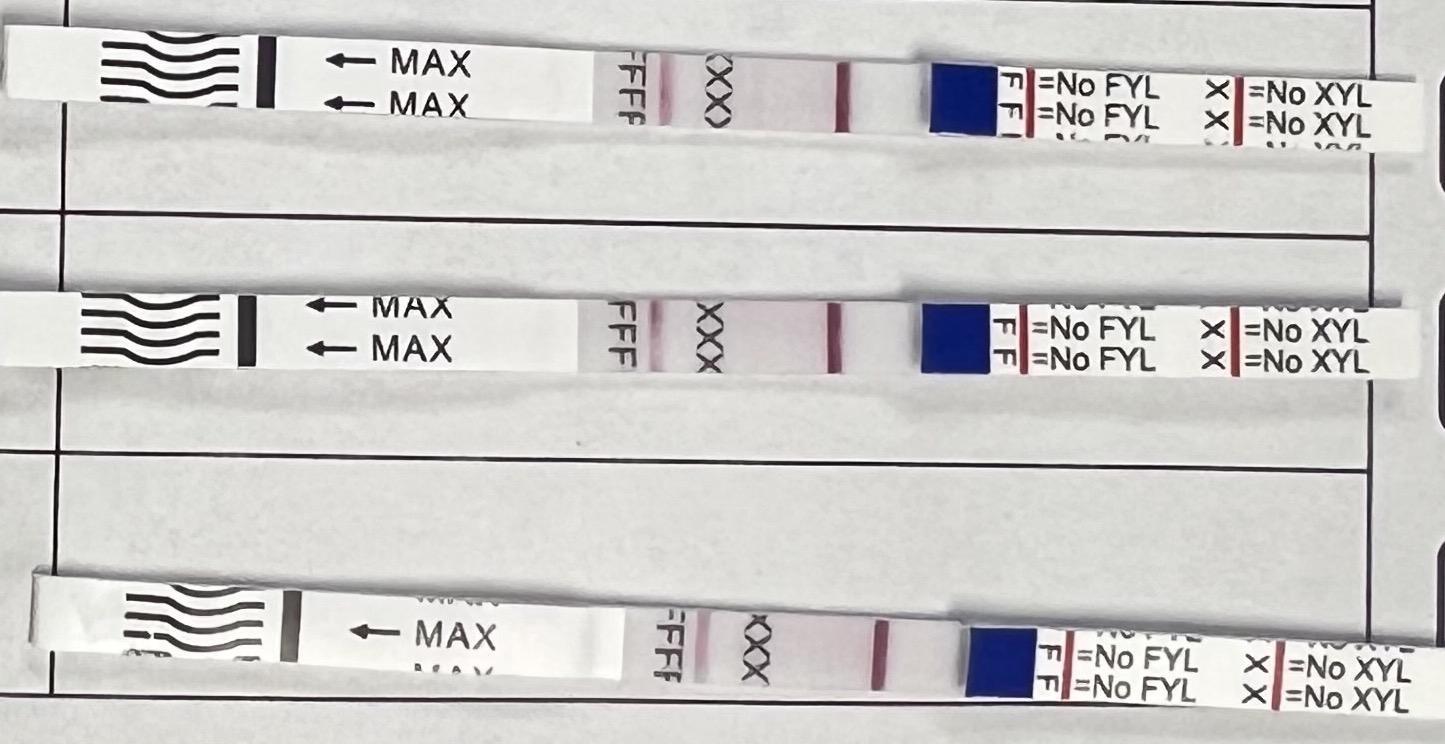 |
| 2100 | - - - | ++- | 888 | 200 | 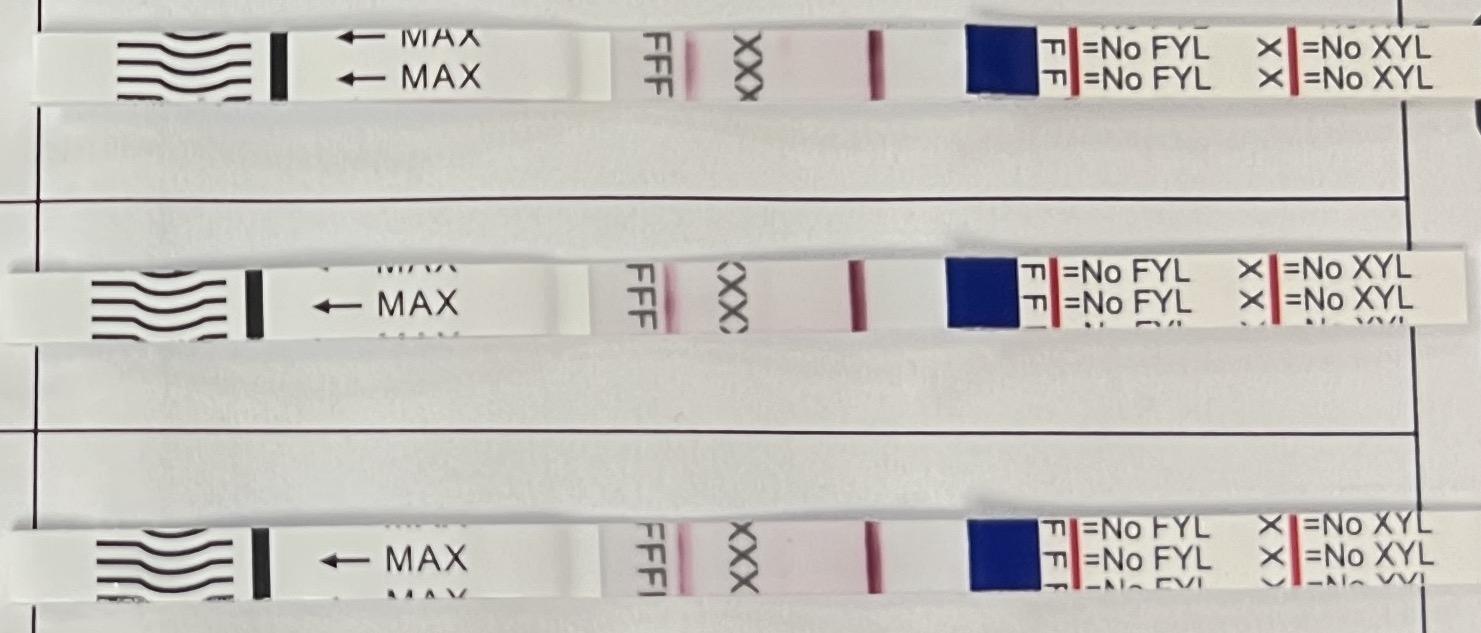 |
| 2000 | - - - | ++- | 887 | 200 | 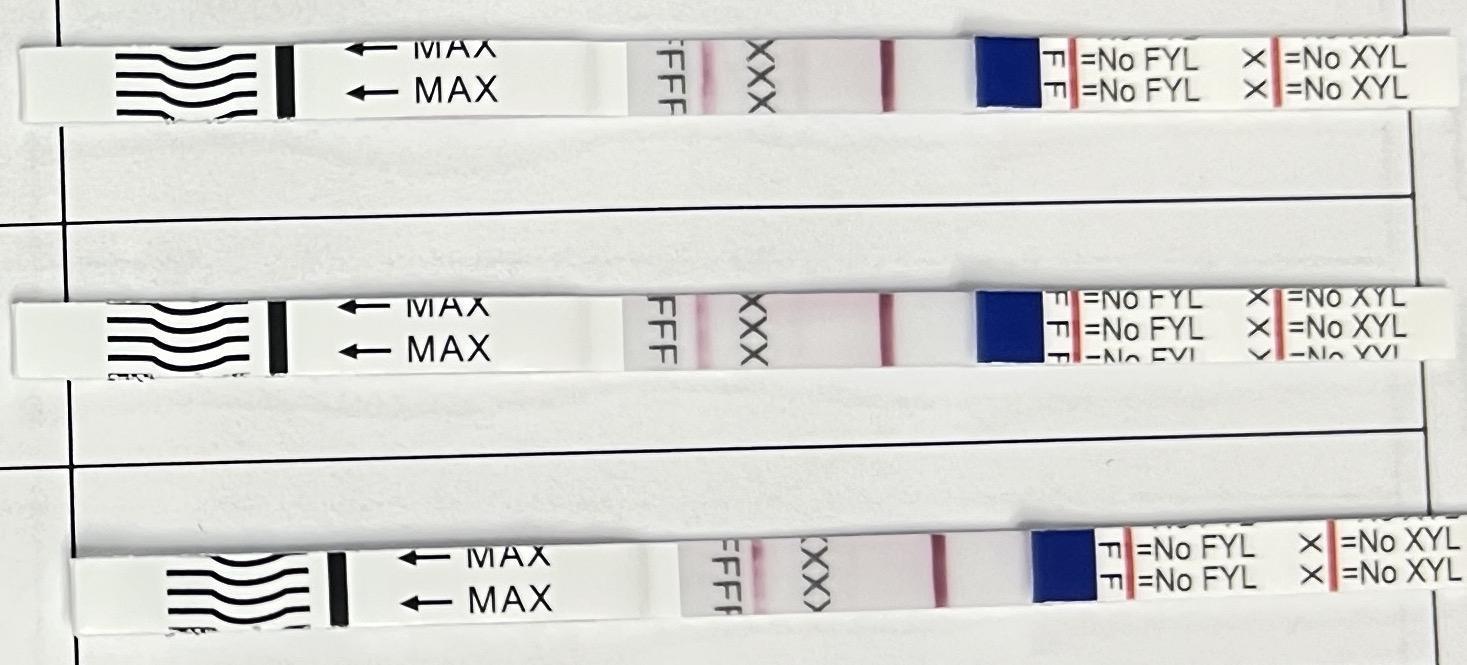 |
| 1000 | - - - | ++- | 888 | 200 | 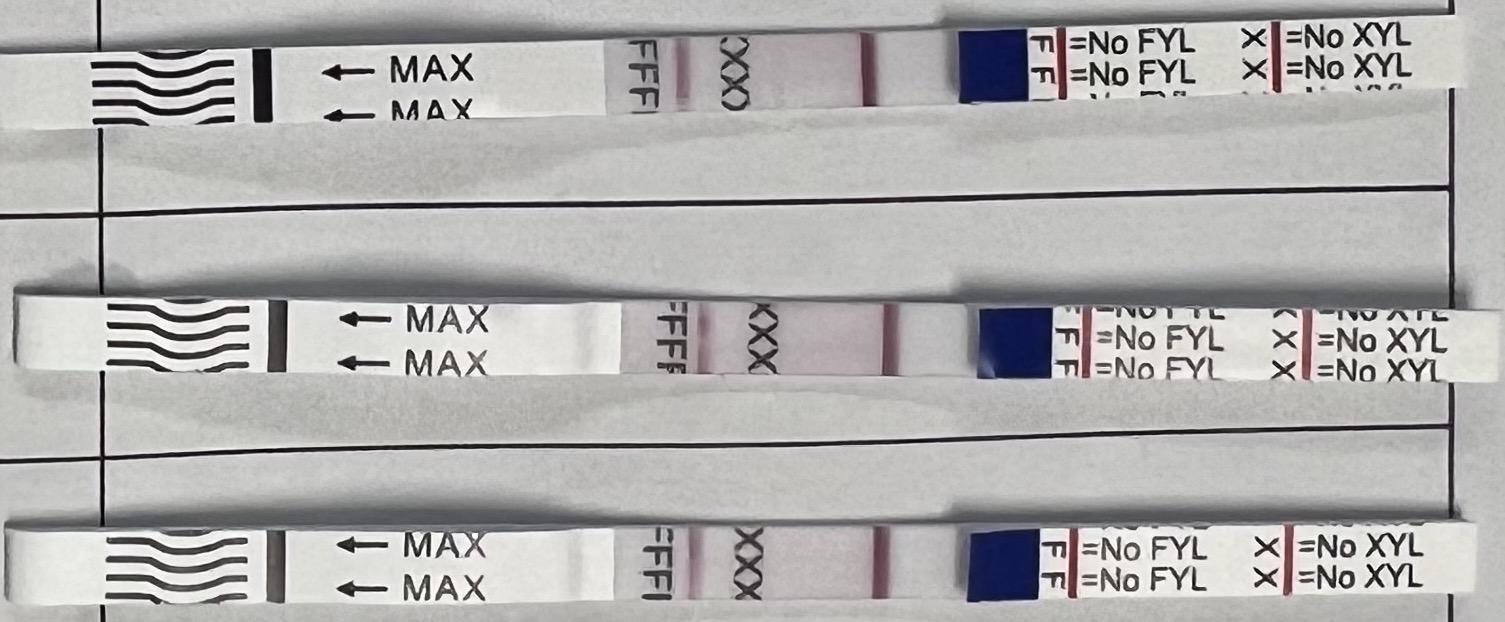 |
| 800 | - - - | +-- | 887 | 320 | 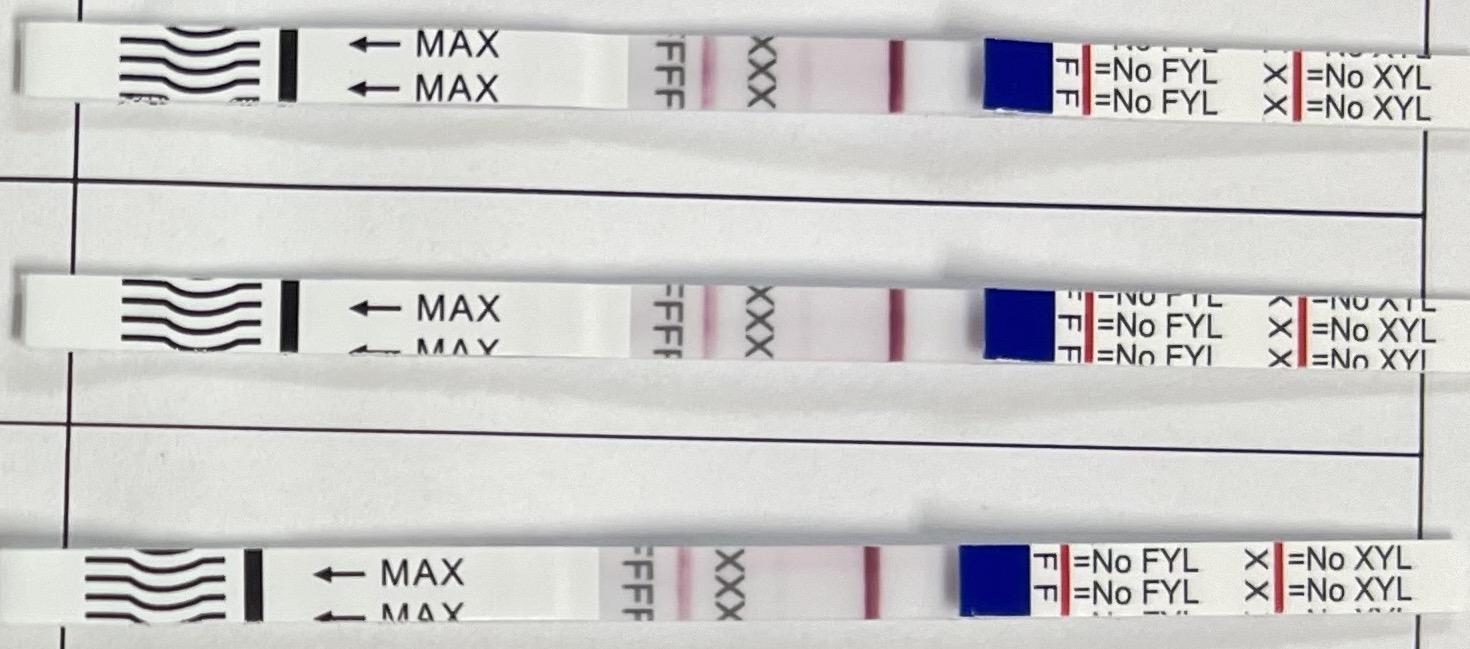 |
| 750 | - - - | - - - | 877 | 222 | 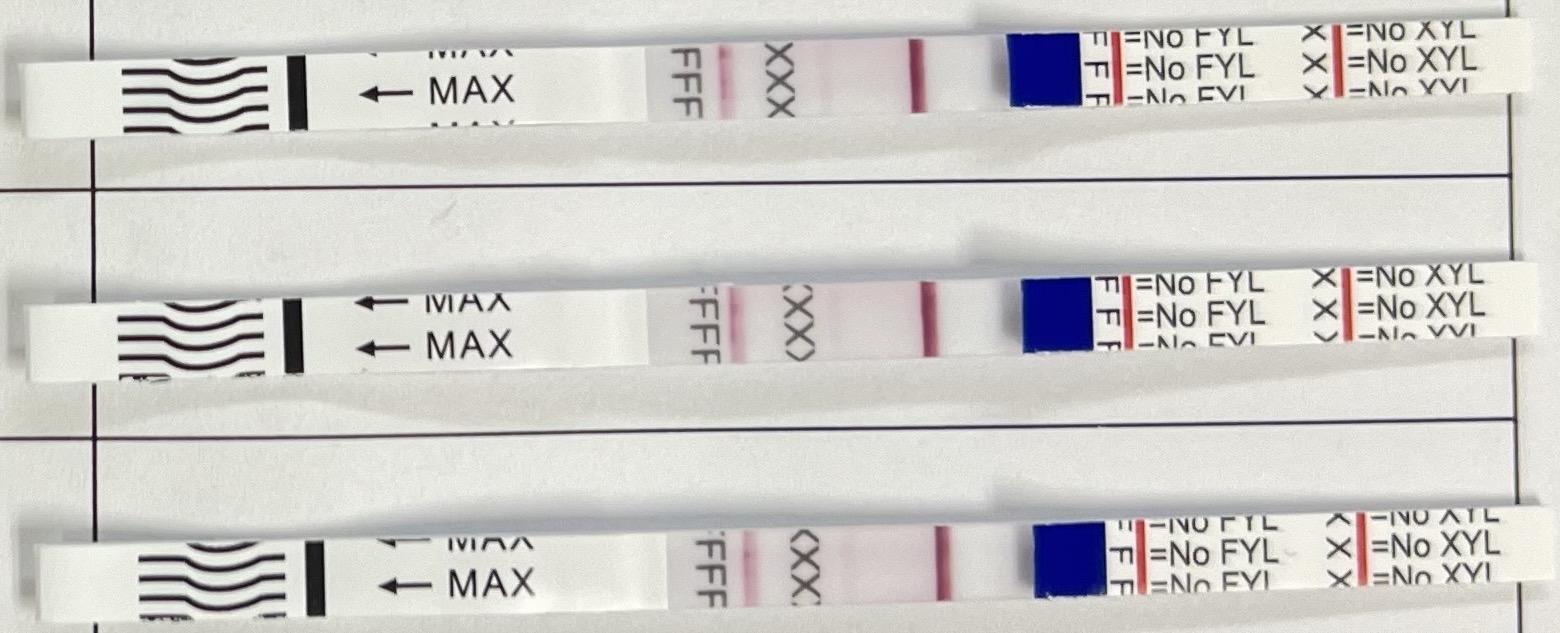 |

##

## Table S2. Fentanyl and fentanyl analogs tested with DSG Version 1

We tested these compounds on Dual Test Strips (DSG lot D2306281), which detect fentanyl and xylazine, starting from high concentrations and gradually decreasing to lower concentrations. For the lower concentrations, we tested three strips for each concentration. The next column lists the intensity values based on a visual scorecard and images of the test strips for each concentration.

| Analyte | Conc ng/ml | Results  Fent Xyl | | Intensity (Fen) | Intensity (Xyl) | Pictures of Test Strips |
| --- | --- | --- | --- | --- | --- | --- |
| Fentanyl HCL | 500000 | + | - | 0 | 7 | 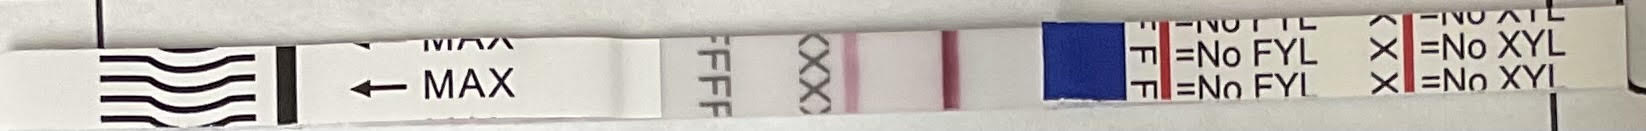 |
| 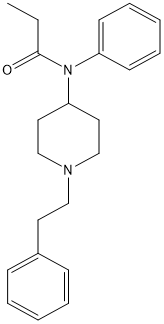 | 50000 | + | - | 0 | 7 | 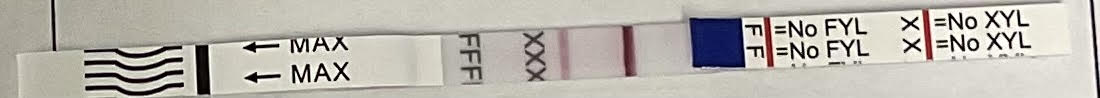 |
| 5000 | + | - | 0 | 8 | 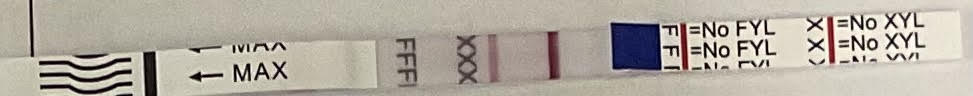 |
| 500 | + | - | 0 | 7 | 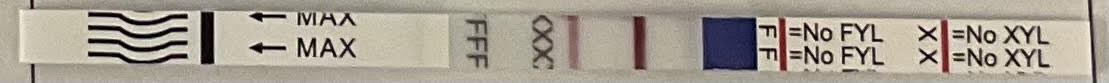 |
| 300 | + | - | 0 | 6 | 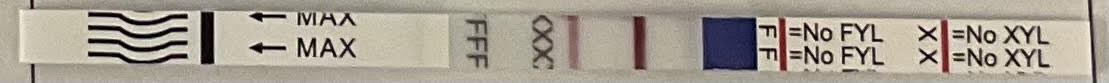 |
| 200 | +++ | - | 000 | 555 | 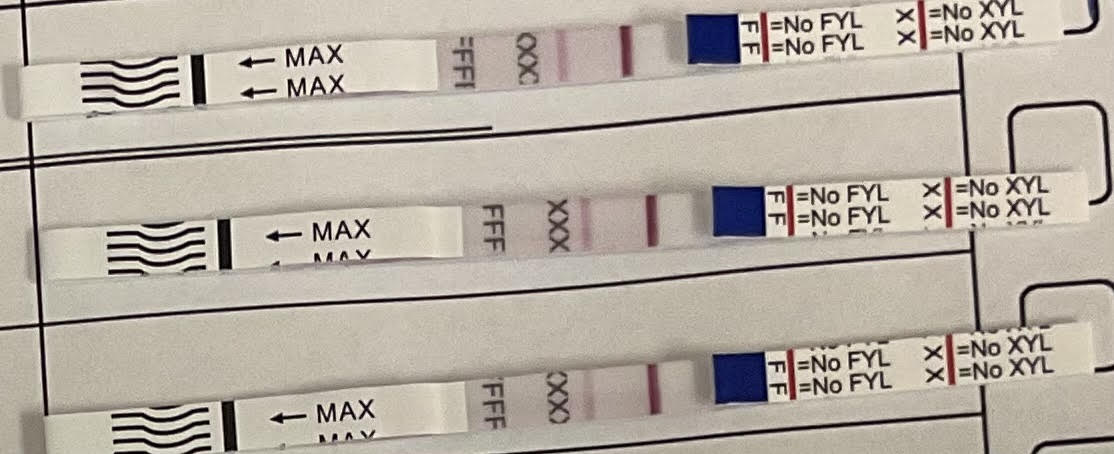 |
| 100 | +++ | - | 000 | 556 | 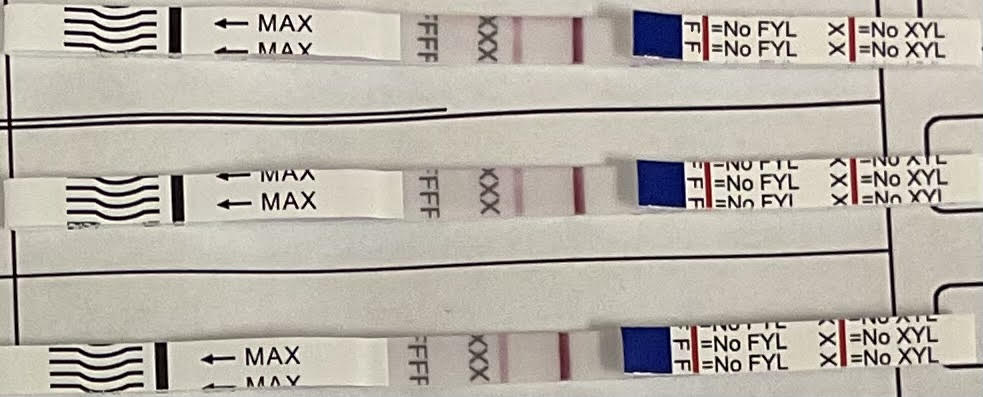 |
| 90 | -++ | - | 200 | 667 | 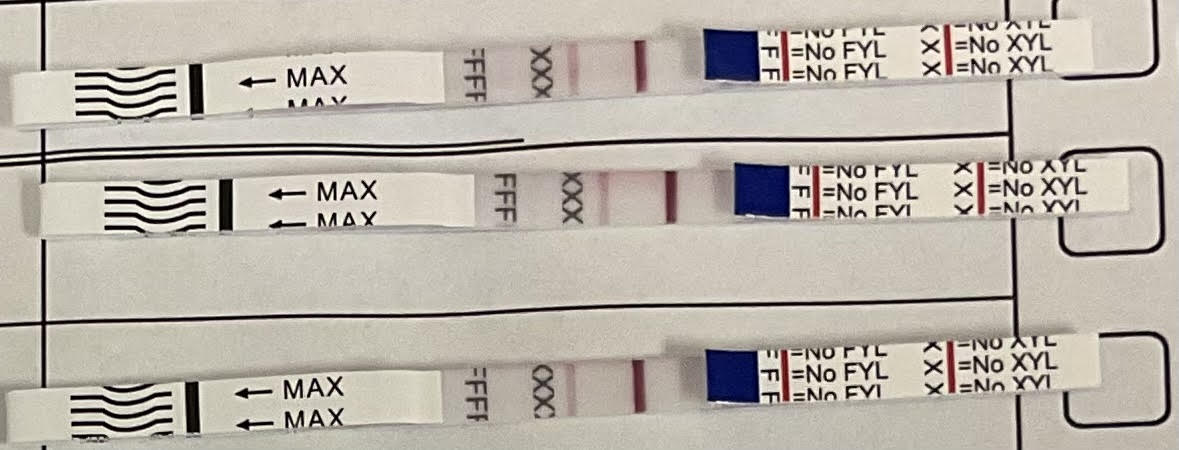 |
| 80 | - - + | - | 110 | 666 | 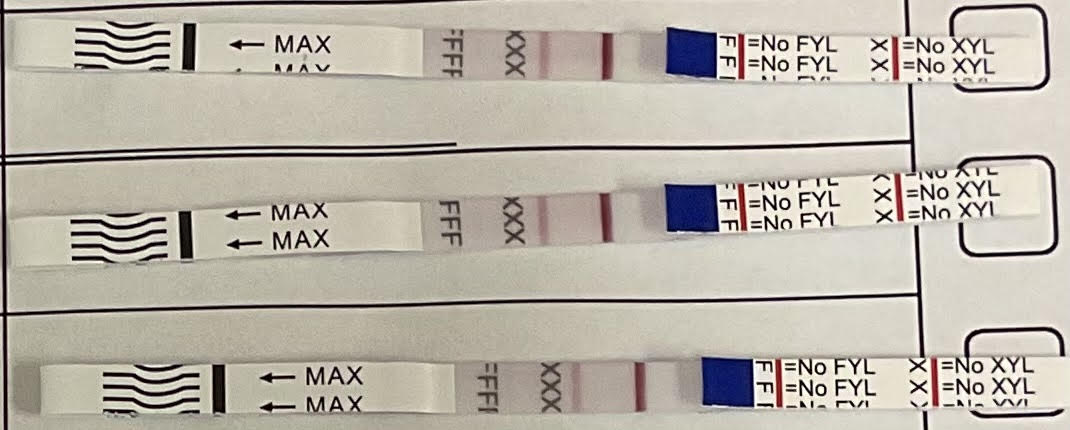 |
| 75 | -+- | - | 101 | 667 | 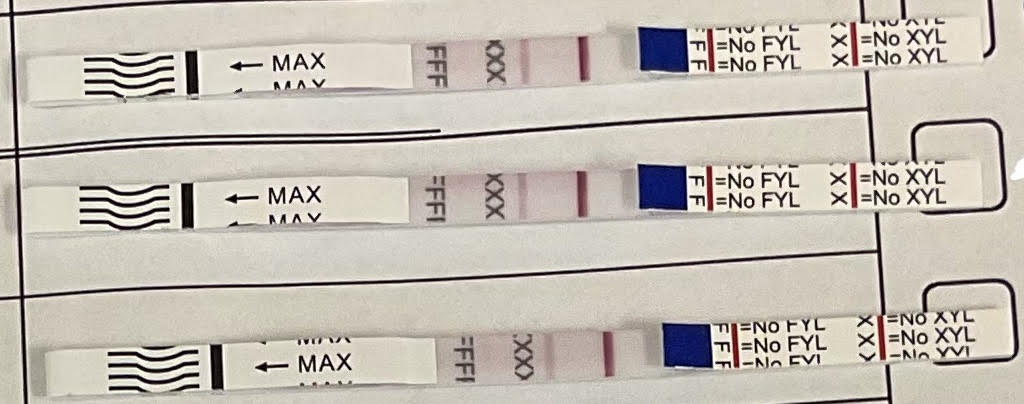 |
| 50 | - - - | - | 111 | 667 | 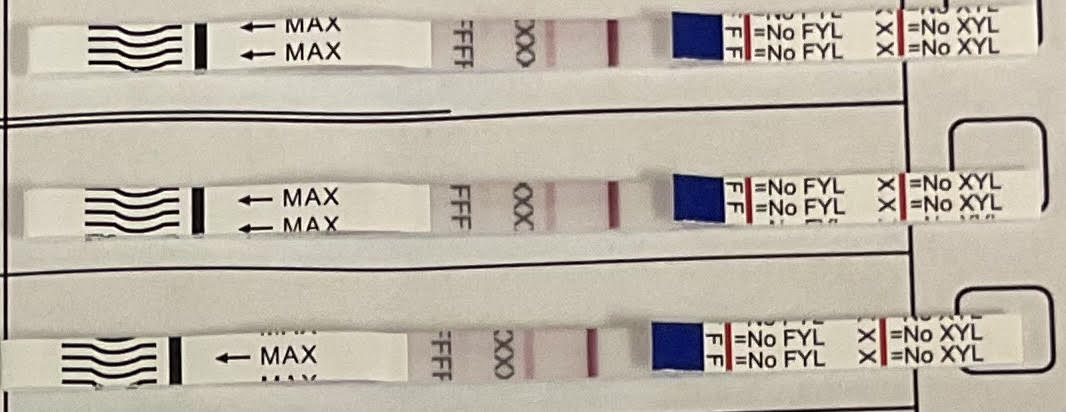 |
| 25 | - - - | - | 222 | 555 | 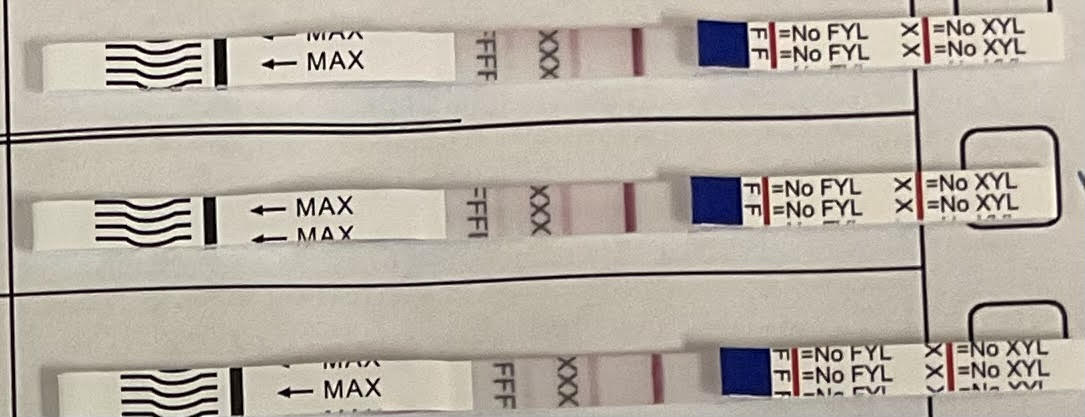 |
| 10 | - - - | - | 555 | 556 | 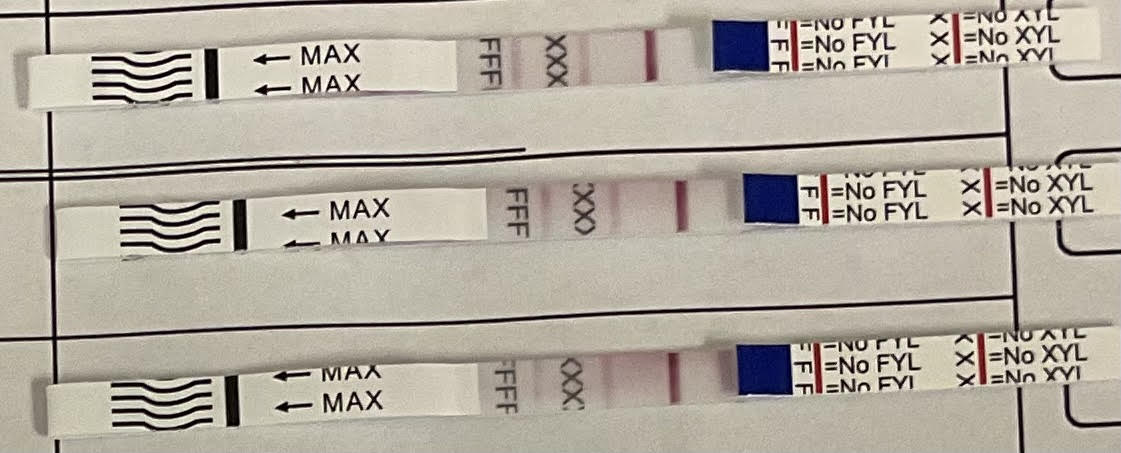 |
|  |  |  |  |  |  |  |
| Furanyl Fentanyl | 500000 | + | - | 0 | 7 | 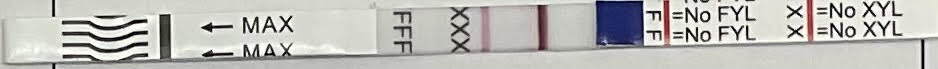 |
| 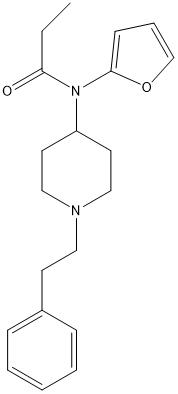 | 50000 | + | - | 0 | 8 | 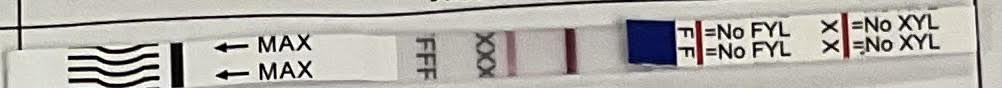 |
| 5000 | + | - | 0 | 8 | 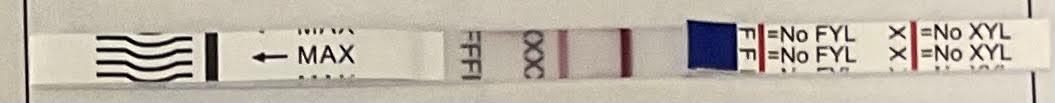 |
| 500 | + | - | 0 | 7 | 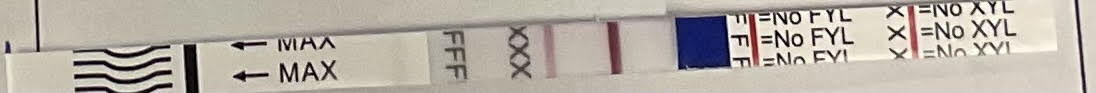 |
| 200 | --- | --- | 111 | 667 | 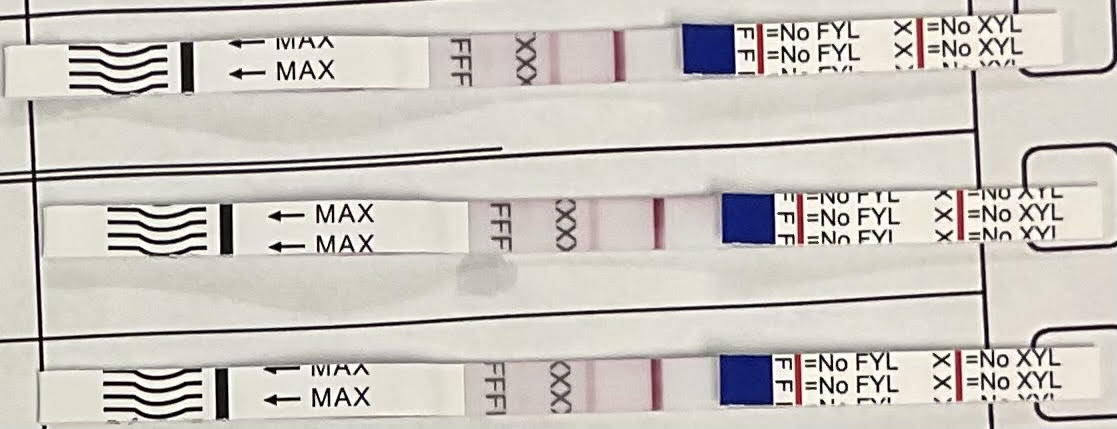 |
| 150 | --- | --- | 222 | 666 | 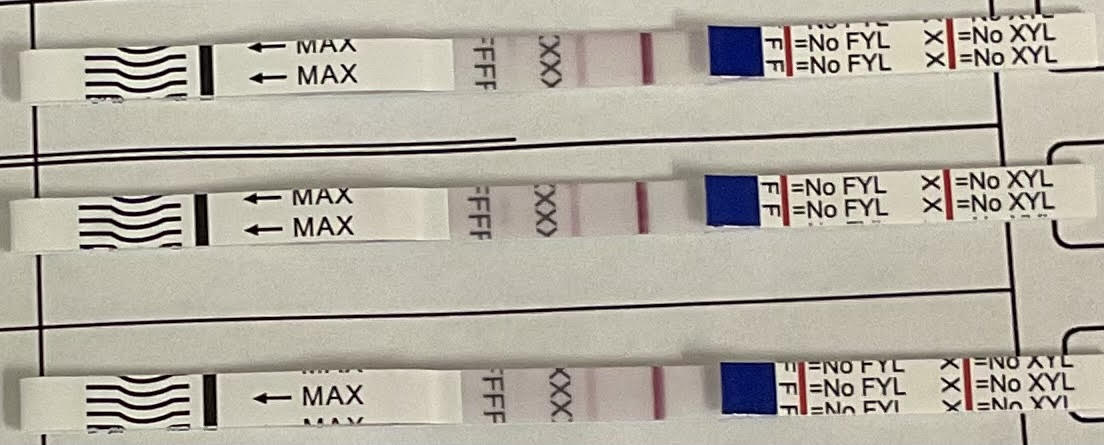 |
| 100 | --- | --- | 222 | 656 | 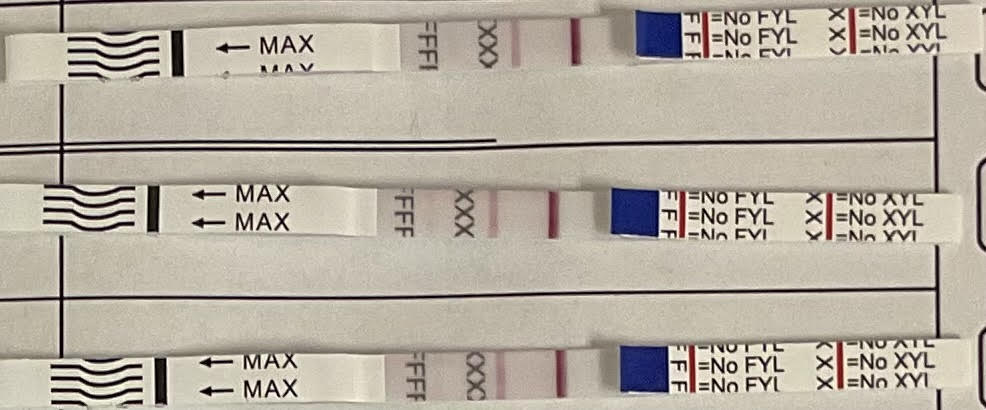 |
|  |  |  |  |  |  |
| Butyryl Fentanyl | 500000 | + | - | 0 | 7 | 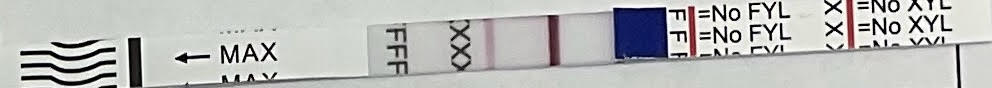 |
| 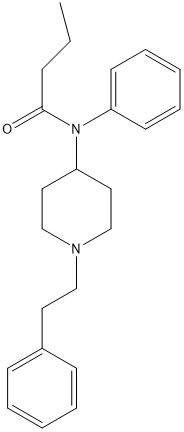 | 50000 | + | - | 0 | 8 | 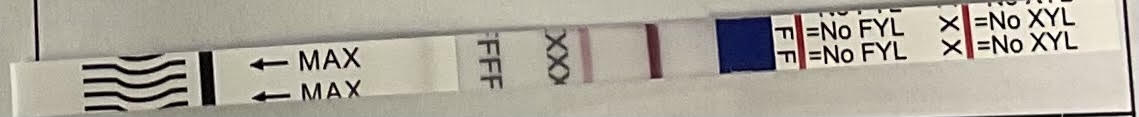 |
| 5000 | + | - | 0 | 8 | 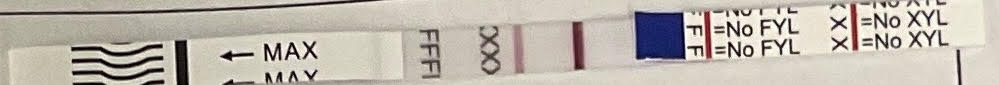 |
| 500 | + | - | 0 | 8 | 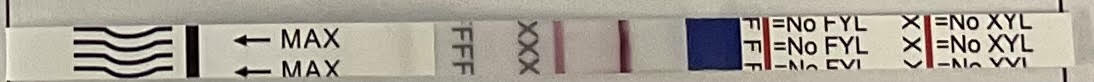 |
| 200 | +++ | --- | 000 | 767 | 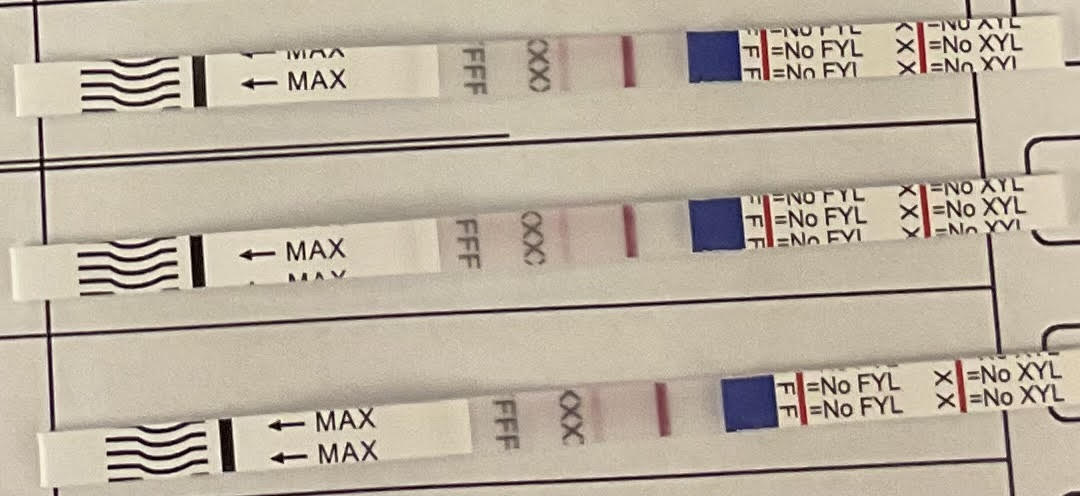 |
| 150 | +++ | --- | 000 | 878 | 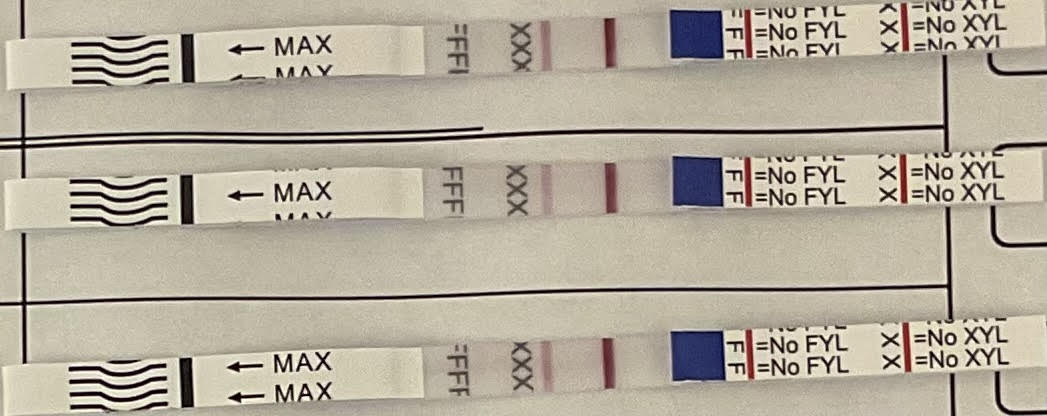 |
| 100 | +-- | --- | 011 | 677 | 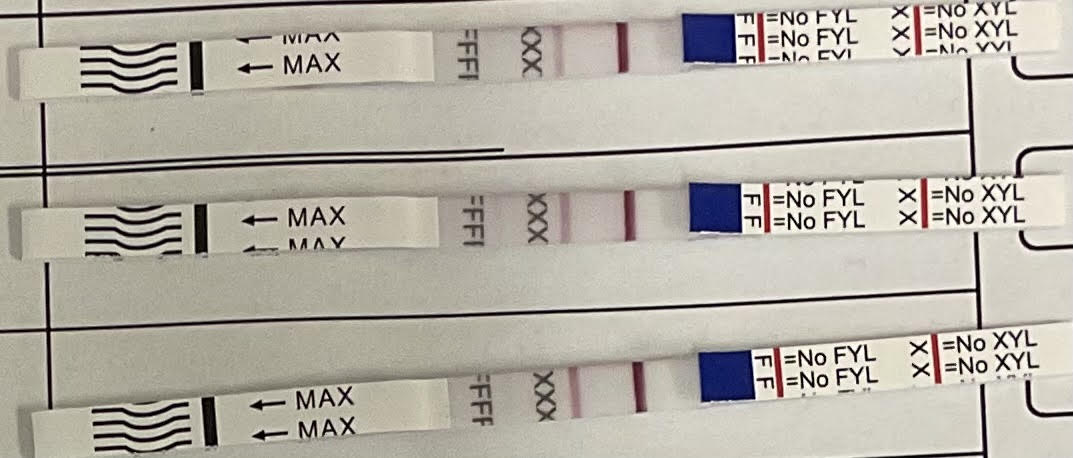 |
|  |  |  |  |  |  |  |
| B-hydroxy Fentanyl | 500000 | + | - | 0 | 6 | 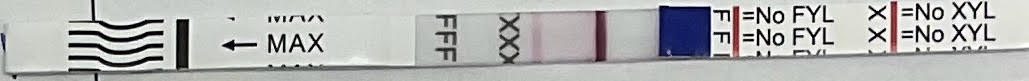 |
| 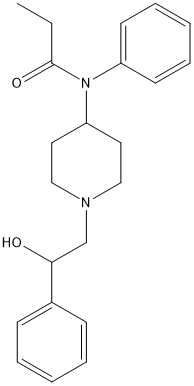 | 50000 | + | - | 0 | 7 | 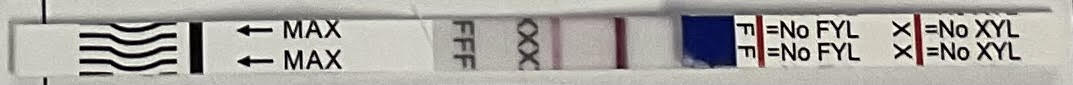 |
| 5000 | + | - | 0 | 8 | 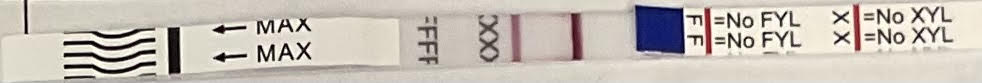 |
| 500 | + | - | 0 | 8 | 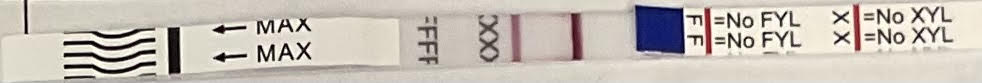 |
| 200 | +++ | --- | 000 | 766 | 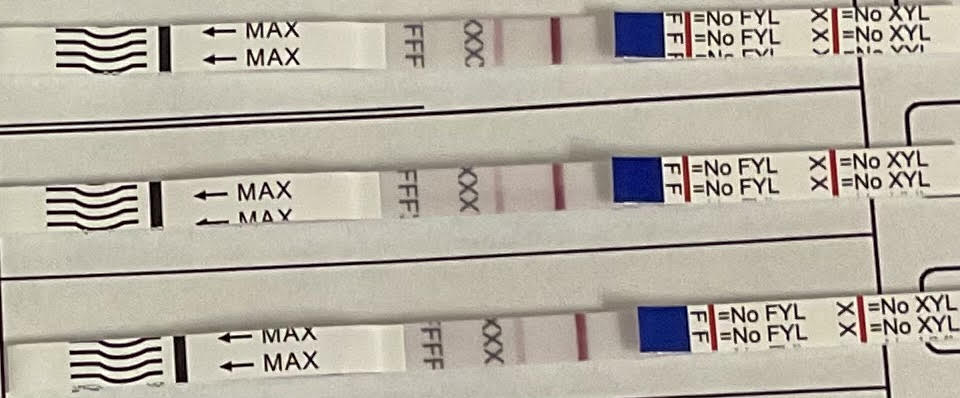 |
| 150 | +++ | --- | 000 | 877 | 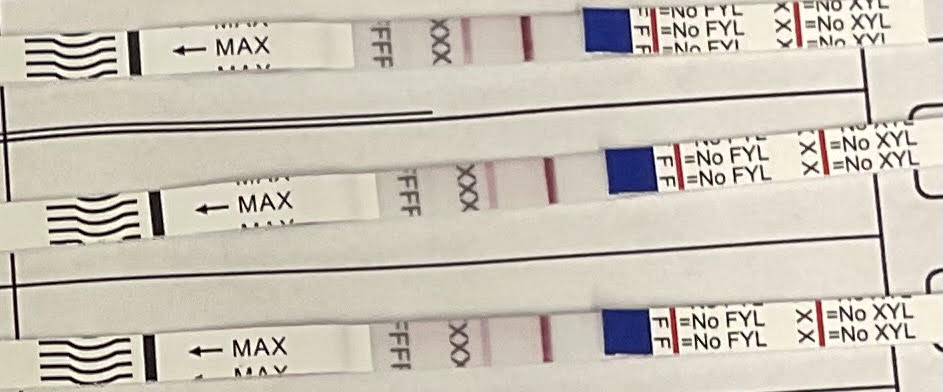 |
| 100 | +++ | --- | 000 | 666 | 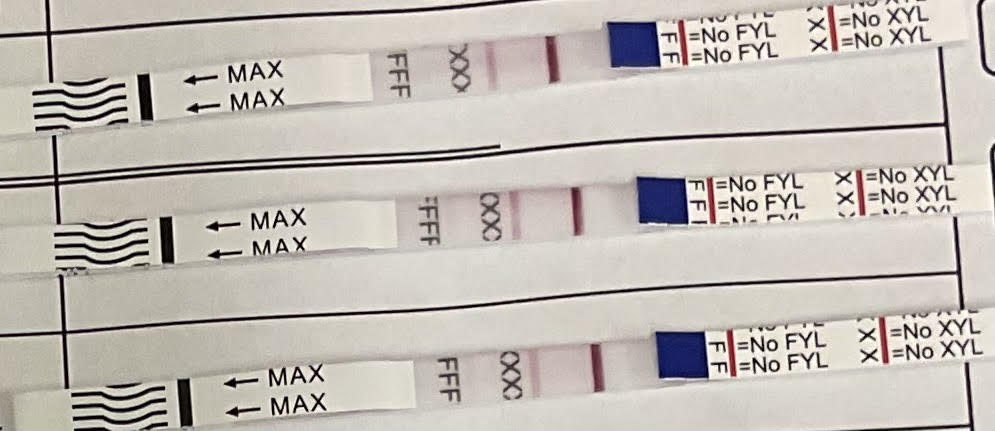 |
|  |  |  |  |  |  |
| Acetyl Fentanyl | 500000 | + | - | 0 | 7 | 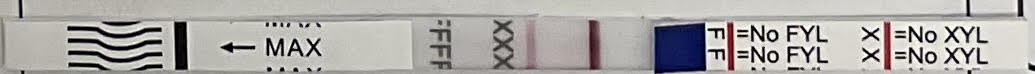 |
| 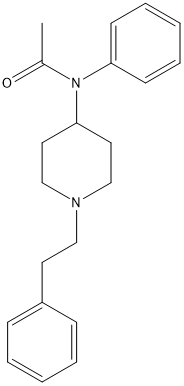 | 50000 | + | - | 0 | 8 | 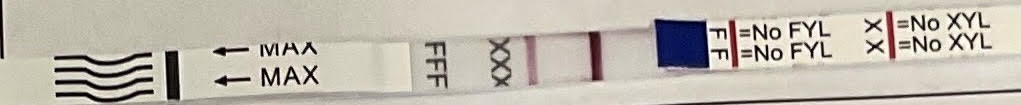 |
| 5000 | + | - | 0 | 8 | 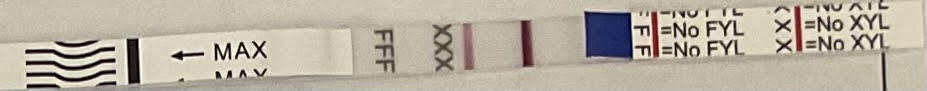 |
| 500 | + | - | 0 | 8 | 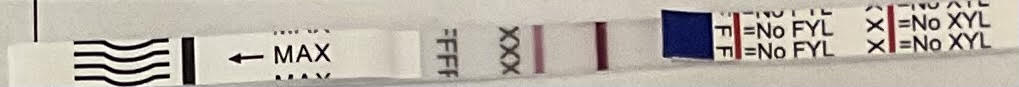 |
| 200 | +++ | --- | 000 | 666 | 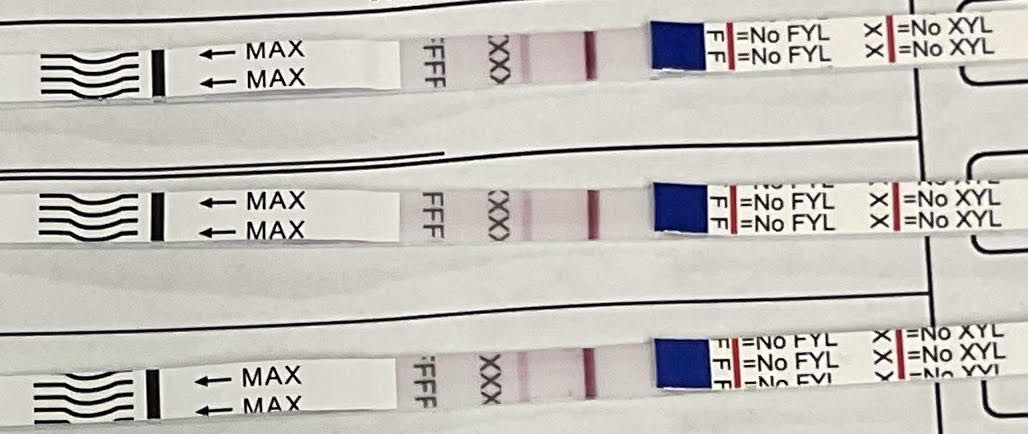 |
| 150 | +++ | --- | 000 | 666 | 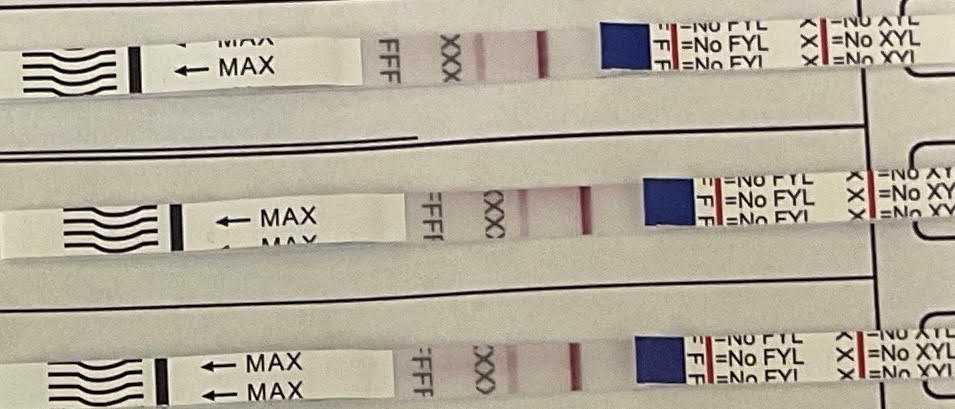 |
| 100 | +++ | --- | 000 | 666 | 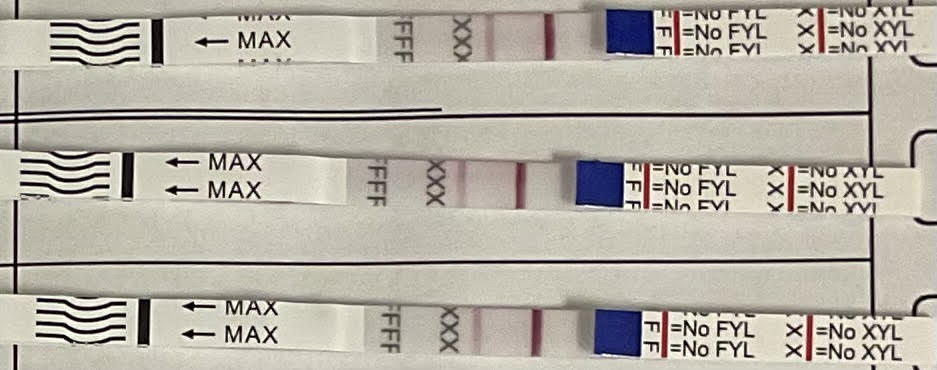 |
|  |  |  |  |  |  |  |
| Acryl Fentanyl | 500000 | + | - | 0 | 6 | 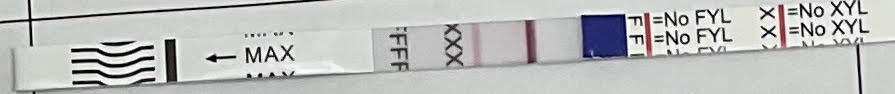 |
| 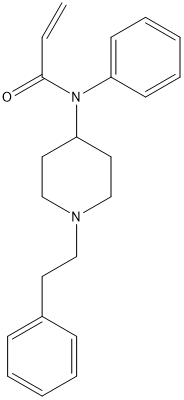 | 50000 | + | - | 0 | 6 | 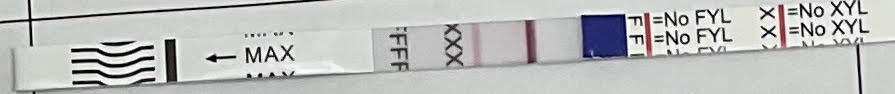 |
| 5000 | + | - | 0 | 7 | 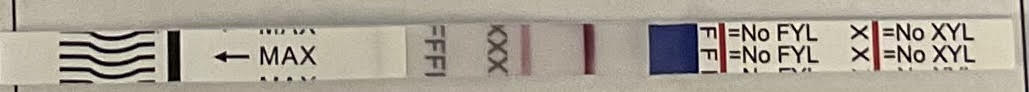 |
| 500 | + | - | 0 | 7 | 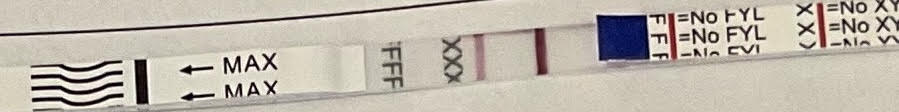 |
| 200 | +++ | --- | 000 | 666 | 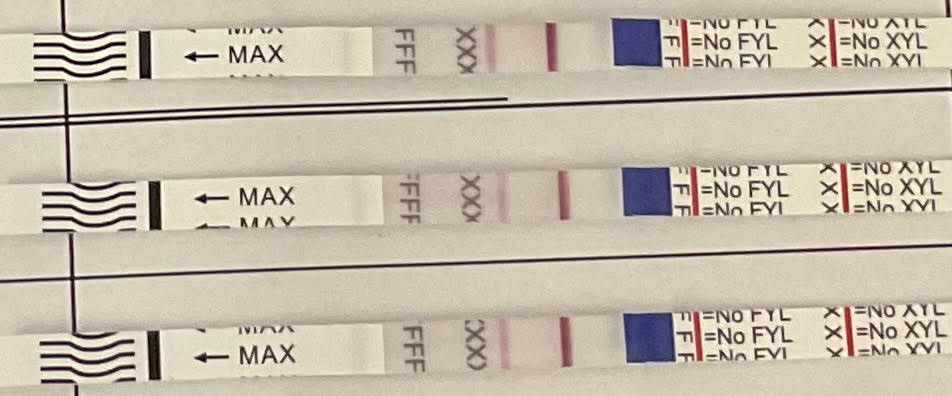 |
| 150 | --- | --- | 111 | 766 | 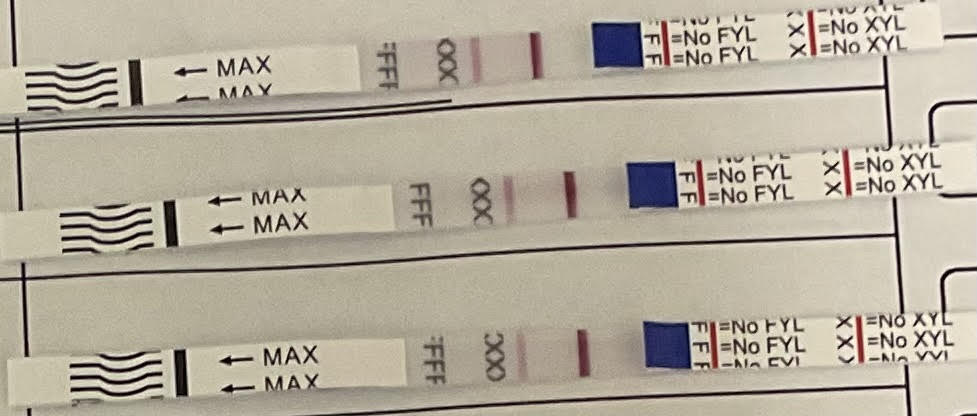 |
| 100 | -++ | --- | 100 | 766 | 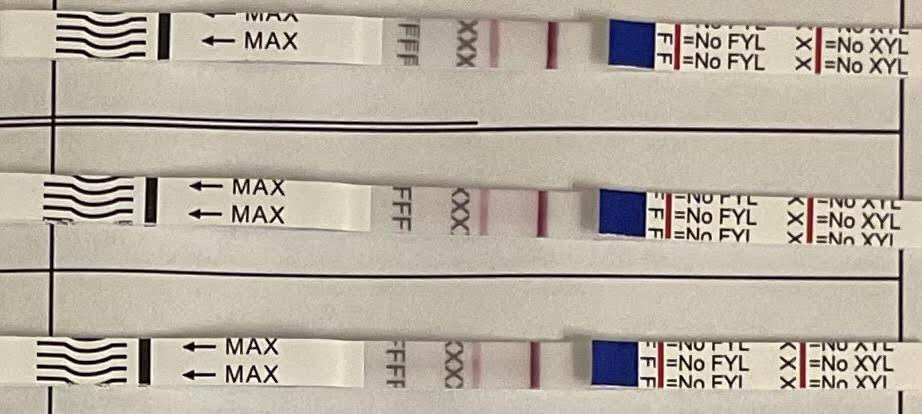 |
|  |  |  |  |  |  |
| 4-FluoroFentanyl | 500000 | + | - | 0 | 7 | 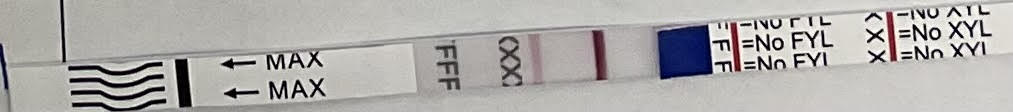 |
| 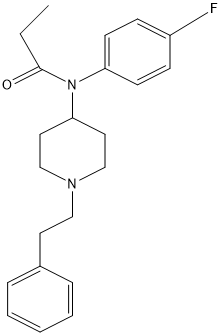 | 50000 | + | - | 0 | 8 | 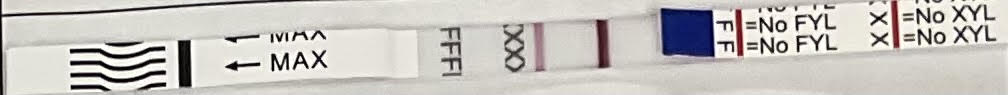 |
| 5000 | + | - | 0 | 8 | 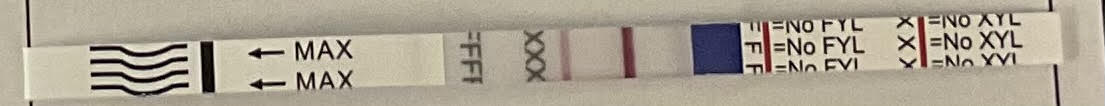 |
| 500 | + | - | 0 | 8 | 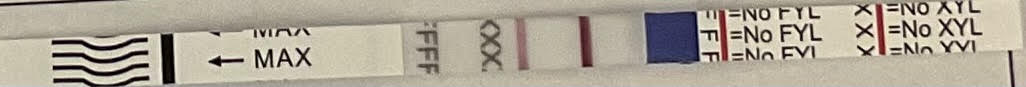 |
| 200 | +++ | --- | 000 | 777 | 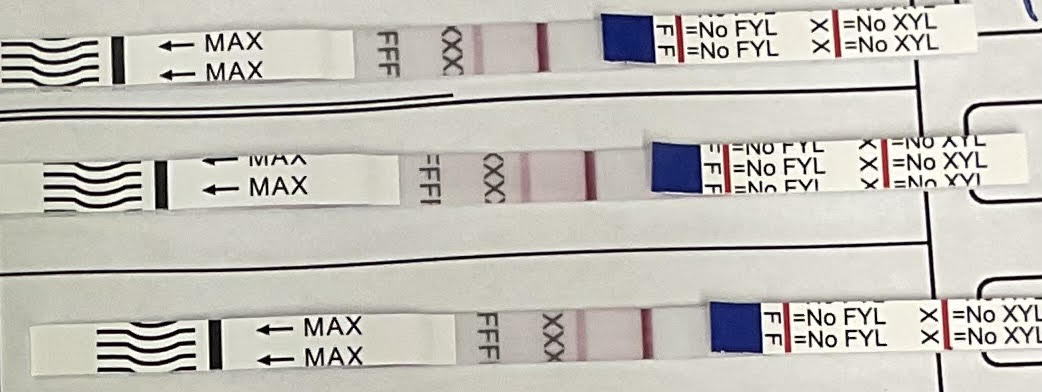 |
| 150 | --- | --- | 111 | 666 | 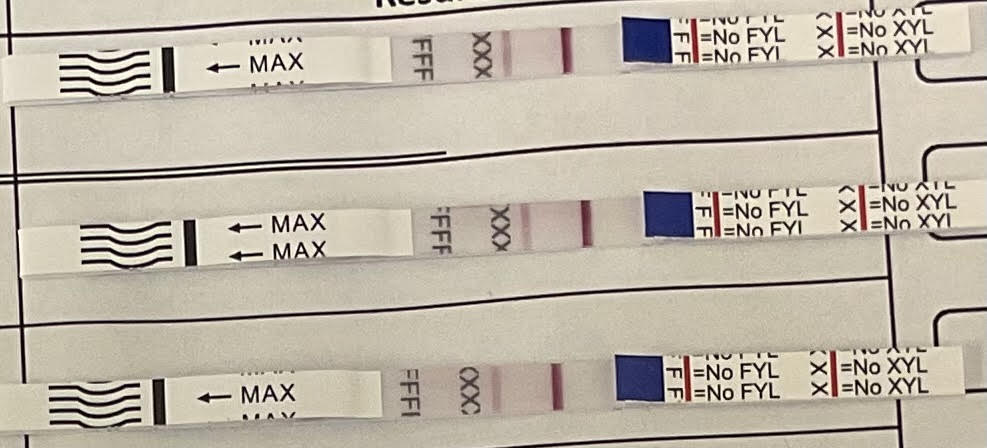 |
| 100 | --- | --- | 111 | 677 | 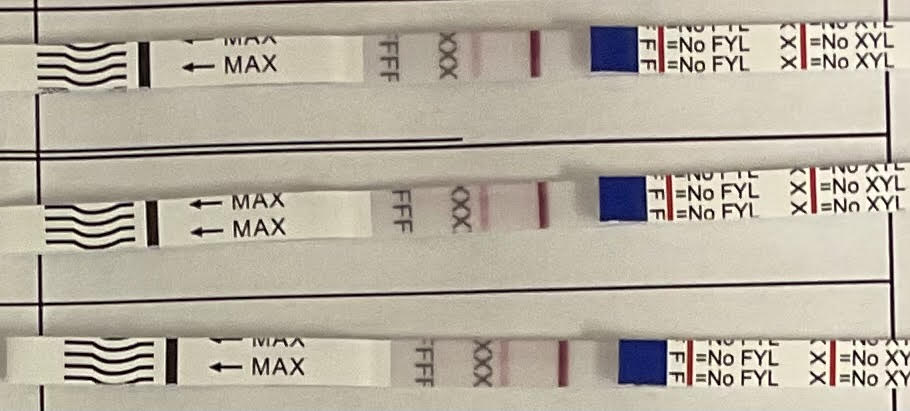 |
|  |  |  |  |  |  |  |
| Valeryl Fentanyl | 500000 | + | - | 0 | 6 | 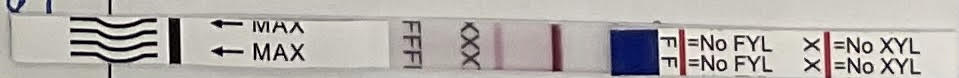 |
| 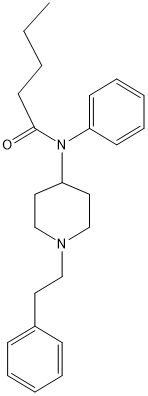 | 50000 | + | - | 0 | 8 | 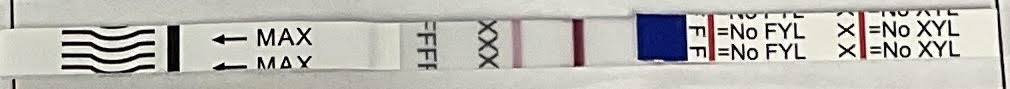 |
| 5000 | + | - | 0 | 8 | 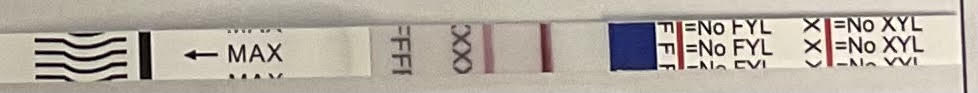 |
| 500 | + | - | 0 | 8 | 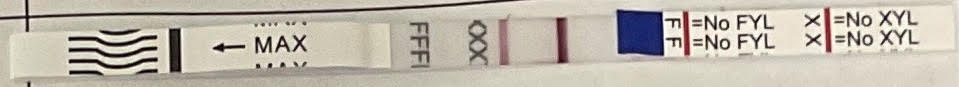 |
| 200 | --- | --- | 222 | 766 | 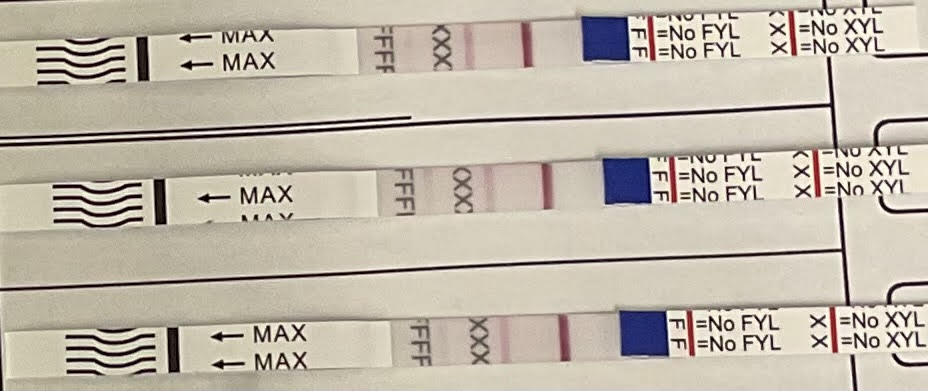 |
| 150 | --- | --- | 222 | 677 | 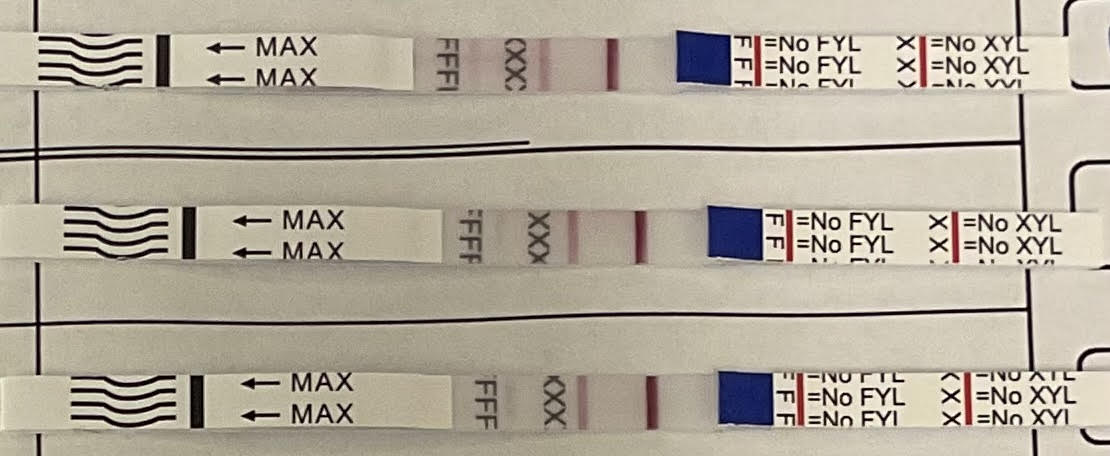 |
| 100 | --- | --- | 211 | 888 | 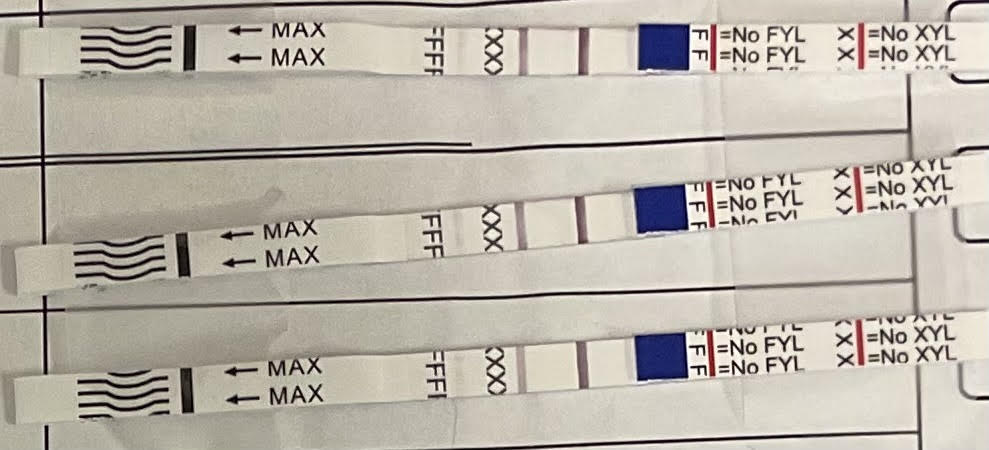 |

## Table S3. Xylazine line intensities for DSG Version 1, BTNX, and WHPM xylazine strips

Line intensities for the xylazine test line in 18 MΩ water using the visual score card (Fig S3) for DSG dual Fentanyl/xylazine strip, BTNX Xylazine test strip, and WHPM Xylazine test strip

| **Test strip Brand/ Manufacturer** | **Xylazine Concentration (ng/mL)** | **Line Intensity** | | |
| --- | --- | --- | --- | --- |
|  |  |  |  |  |
| DSG V1 | 750 | N - 2 | N - 2 | N - 2 |
| 800 | N - 3 | N - 2 | P - 0 |
| 1000 | N - 2 | P - 0 | P - 0 |
| 1250 | N - 2 | P - 0 | P - 0 |
| 2000 | N - 2 | P - 0 | P - 0 |
| 2100 | N - 2- fainter than 2000 | P - 0 | P - 0 |
| **2250 (estimated cutoff)** | P - 0 | P - 0 | P - 0 |
| 2500 | P - 0 | P - 0 | P - 0 |
|  | | | | |
| BTNX XTS | 1000 | N - 1 | N - 1 | N - 1 |
| 1250 | N - 1 | N - 1 | N - 1 |
| 1500 | N - 1 | N - 1 | P - 0 |
| 1750 | N - 1 | N - 1 | P - 0 |
| 2000 | P - 0 | P - 0 | P - 0 |
| 2500 | P - 0 | P - 0 | P - 0 |
|  | | | | |
| WHPM XTS | 2500 | N - 3 | N - 2 | N - 1 |
| 3000 | N - 3 | N - 2 | N - 1 |
| 3250 | N - 3 | N - 2 | N - 1 |
| 3500 | N - 2 | N - 1 | N - 1 |
| 3750 | P - 0 | P - 0 | P - 0 |
| 4000 | P - 0 | P - 0 | P - 0 |
| 5000 | P - 0 | P - 0 | P - 0 |

| N | Indicates a Negative Result |
| --- | --- |
| P | Indicates a Positive Result |

## Table S4. Fentanyl Test Strip Results for selected fentanyl analogs at 100 ng/mL


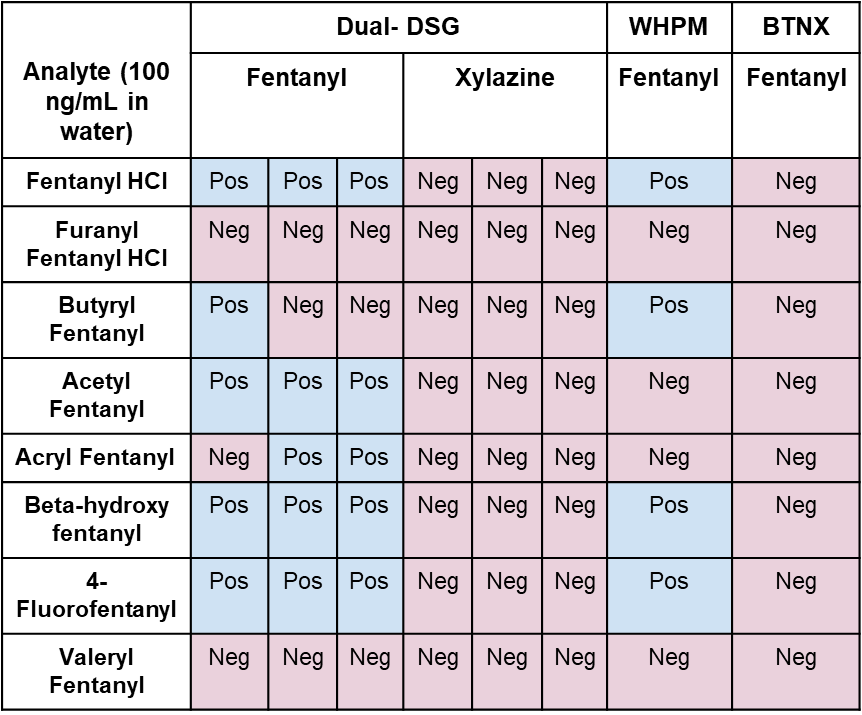


##

## Table S5. Cis-tramadol shows false positive for the Fentanyl line on DSG v1 test strips

| Analyte | Concentration | Result | | Intensity | Picture |
| --- | --- | --- | --- | --- | --- |
| 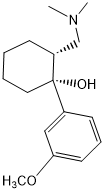 |  | Fen | Xyl |  |  |
| 2mg/ml | Pos | Neg | 0 | 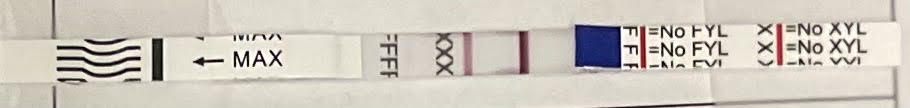 |
| 0.7mg/ml | Pos | Neg | 0 | 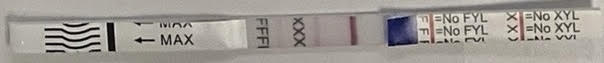 |
| 0.2mg/ml | Neg | Neg | 4 | 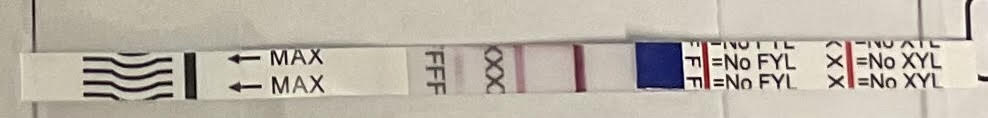 |

##

## Table S6. Lidocaine shows false positive for xylazine line on DSG v1 test strips

| **Analyte** | **Conc** | **Result** | | **Intensity** | **Picture** |
| --- | --- | --- | --- | --- | --- |
|  |  | Fen | Xyl |  |  |
| 2mg/ml | Neg | Pos | 0 | 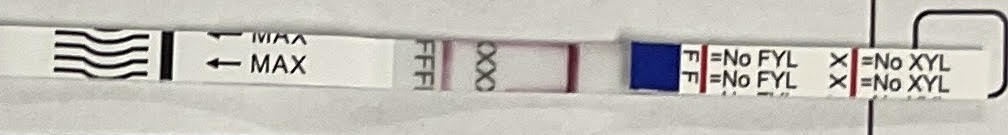 |
| 0.2mg/ml | Neg | Pos | 0 | 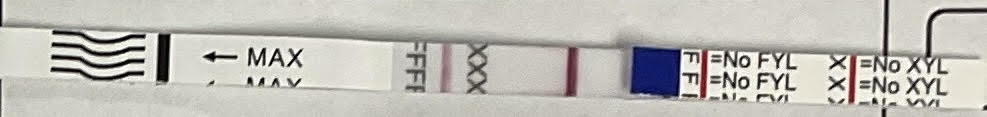 |
| 0.02mg/ml | Neg | Pos | 0 | 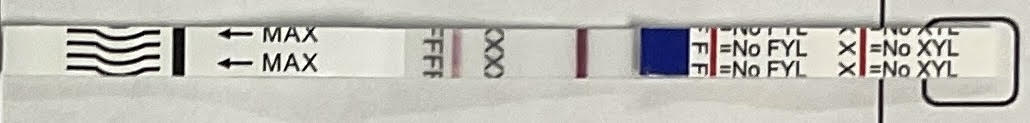 |
| 0.002mg/ml | Neg | Neg | 2 | 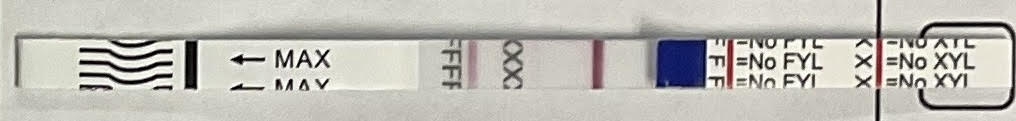 |
| 500 ng/ml | Neg | Neg | 5 | 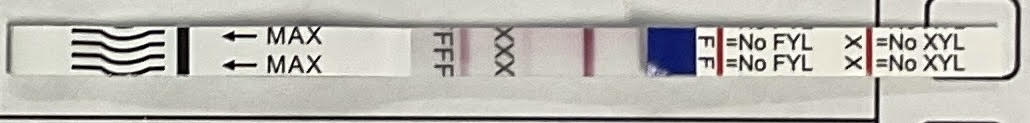 |

## Table S7. False positive for PCP

| **Structure of Phencyclidine (PCP)** | **Concentration (mg/mL)** | **Result** | **Intensity** | **Picture** |
| --- | --- | --- | --- | --- |
| 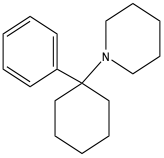 | 2.0 | POS | 0 | 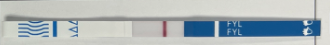 |
| 0.7 | POS | 0 | 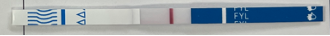 |
| 0.2 | POS | 0 | 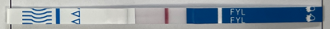 |
| 0.1 | NEG | 2 | 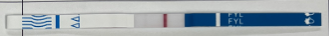 |
| 0.05 | NEG | 2 | 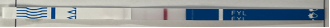 |

## Table S8. False Positive For Diphenhydramine

| **Diphenhydramine** | **Concentration** | **WHPM And BTNX** | **Result** |
| --- | --- | --- | --- |
|  | 2mg/ml |  | Pos  Pos |
| 1mg/ml |  | Pos  Neg (1) |
| 0.7 mg/ml |  | Pos  Neg (2) |
| 0.2 mg/ml |  | Pos  Neg (5) |
| 0.1 mg/ml |  | Neg (2)  Neg (6) |

## Table S9. Nitazene and Nitazene Analog tested on DSG, WHPM, BTNX test strips

We tested Nitrazine and Nitrazine Analog on Dual DSG, WHPM, and BTNX brand test strips at three different concentrations: 0.5 mg/ml, 0.05 mg/ml, and 0.005 mg/ml. In all cases, the test strips yielded negative results at all three concentrations.

| **Analyte** | **DSG V1** | | **WHPM** | **BTNX** |
| --- | --- | --- | --- | --- |
| **Nitazene** | Neg | Neg | Neg | Neg |
| **Menitazine** | Neg | Neg | Neg | Neg |
| **Methylenedioxy benzene** | Neg | Neg | Neg | Neg |
| **5-methyl Etonitazene** | Neg | Neg | Neg | Neg |
| **4-hydroxy nitazene** | Neg | Neg | Neg | Neg |
| **3- methoxy metodesnitrazine** | Neg | Neg | Neg | Neg |
| **N-Piperidinyl 4-hydroxy nitazene** | Neg | Neg | Neg | Neg |
| **N-Pyrrolidino protonitazene** | Neg | Neg | Neg | Neg |
| **5-Aminoisotonitazene** | Neg | Neg | Neg | Neg |

## Figure S4. Xylazine test strip[ DSG v1] performance at 1000 and 2000 ng/mL, with at least 20 strips tested per concentration

## Figure S5. False positive test results for DSG V2

## Table S10. Composition of artificial urine

| **Compound Name** | **Quantity (g/100 mL)** |
| --- | --- |
| Sodium sulfate | 0.17 |
| Uric acid | 0.03 |
| Trisodium citrate dihydrate | 0.07 |
| Creatinine | 0.09 |
| Urea | 1.50 |
| Potassium chloride | 0.23 |
| Sodium chloride | 0.18 |
| Calcium chloride | 0.02 |
| Ammonium chloride | 0.13 |
| Epsomite | 0.11 |
| Sodium dihydrogen phosphate dihydrate | 0.29 |
| Sodium hydrogen phosphate dihydrate | 0.08 |
